# Supplementary material for: One-pot odorless thia-Michael reaction by copper ferrite nanoparticle-catalyzed reaction of elemental sulfur, aryl halides and electron-deficient alkenes
Source: Royal Society of Chemistry journal article supplement (doi:10.1039/c5nj00867k), 2015-01-01
Supplement: c5nj00867k1.pdf [file c5nj00867k1.pdf]

## Supplementary material

### **One-pot and Odorless Thia-Michael Reaction by Copper Ferrite Nanoparticles Catalyzed Reaction of Elemental Sulfur, Aryl Halides and Electron-deficient Alkenes**

Mohammad Gholinejad,<sup>\*a</sup> Habib Firouzabadi<sup>\*b</sup>

<sup>a</sup>Department of Chemistry, Institute for Advanced Studies in Basic Sciences (IASBS), P. O. Box

45195-1159, Gava zang, Zanjan 45137-6731, Iran

<sup>b</sup>The Late Professor Ali Akbar Moshfegh Laboratory, Department of Chemistry, College of  
Sciences Shiraz University, Shiraz, 71454, Iran

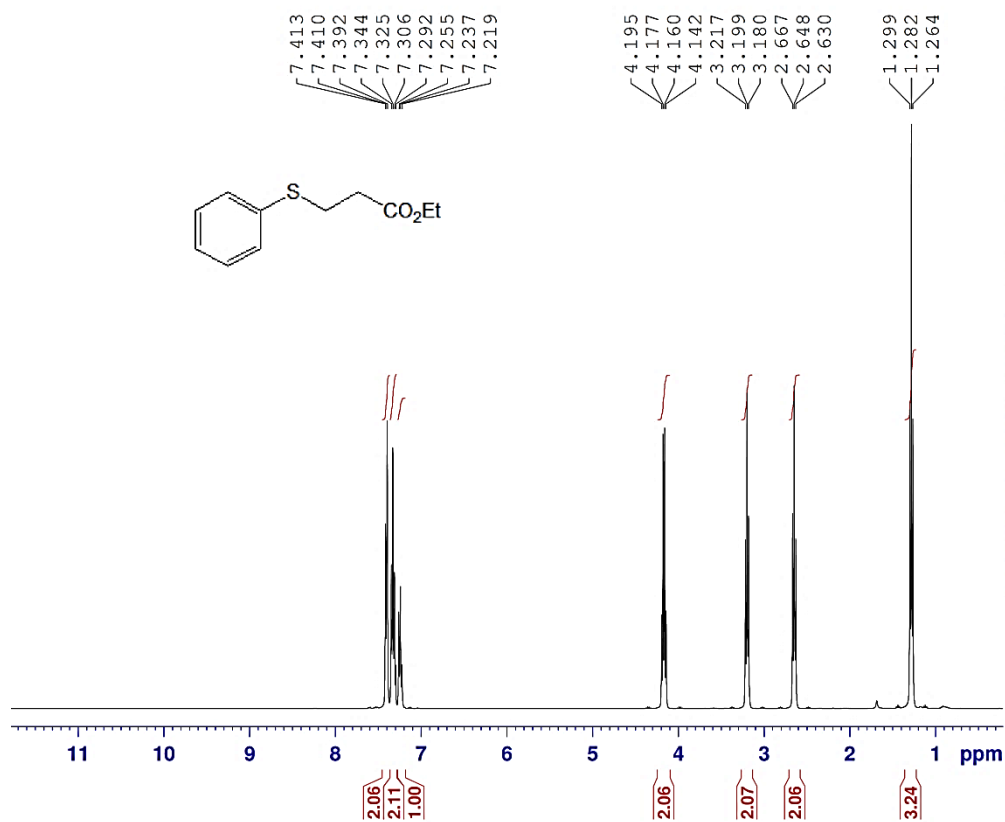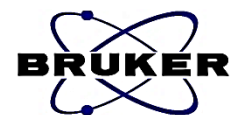

NAME Dr.Gholi nejad  
 EXPNO 329  
 PROCNO 1  
 Date\_ 20130206  
 Time 9.38  
 INSTRUM spect  
 PROBHD 5 mm PABBO BB-  
 PULPROG zg30  
 TD 65536  
 SOLVENT CDCl3  
 NS 10  
 DS 0  
 SWH 8012.820 Hz  
 FIDRES 0.122266 Hz  
 AQ 4.0894966 sec  
 RG 203  
 DW 62.400 usec  
 DE 6.50 usec  
 TE 296.5 K  
 D1 6.0000000 sec  
 TDO 1

----- CHANNEL f1 -----  
 NUC1 1H  
 P1 14.00 usec  
 PL1 -2.00 dB  
 PL1W 11.86359406 W  
 SF01 400.2236020 MHz  
 SI 32768  
 SF 400.2200000 MHz  
 WDW EM  
 SSB 0  
 LB 0.30 Hz  
 GB 0  
 PC 1.00

<sup>1</sup>H NMR of 1a

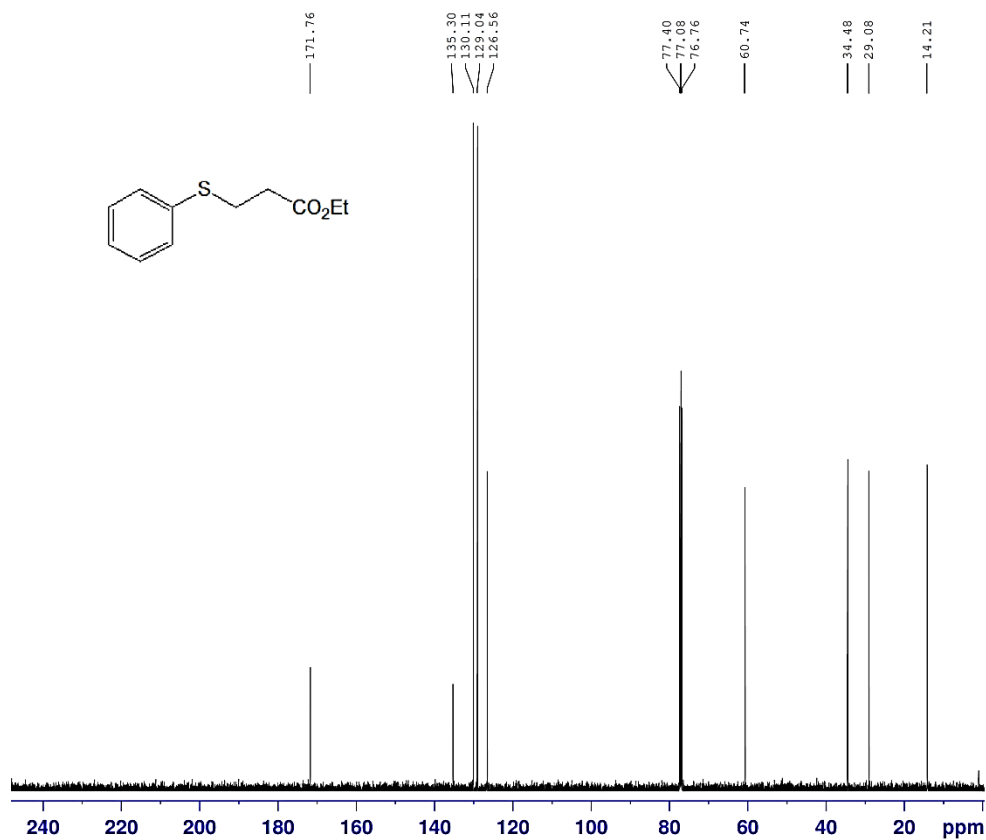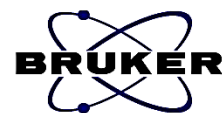

```

NAME      Dr.Gholi nejad
EXPNO     330
PROCNO    1
Date_     20130206
Time      9.41
INSTRUM   spect
PROBHD    5 mm PABBO BB-
PULPROG   zgpg30
TD         65536
SOLVENT   CDCl3
NS         80
DS         0
SWH       25252.525 Hz
FIDRES    0.385323 Hz
AQ        1.2976629 sec
RG         2050
DW        19.800 usec
DE         6.50 usec
TE         296.6 K
D1         2.00000000 sec
D11        0.03000000 sec
TD0        1

===== CHANNEL f1 =====
NUC1       13C
P1         9.00 usec
PL1        -0.90 dB
PL1W       42.02801895 W
SFO1       100.6479784 MHz

===== CHANNEL f2 =====
CPDPRG2    waltz16
NUC2       1H
PCPD2      90.00 usec
PL2        -2.00 dB
PL12       14.16 dB
PL13       17.90 dB
PL12W      11.86359406 W
PL13W      0.28722104 W
SFO2       400.2216009 MHz
SI         32768
SF         100.6353990 MHz
WDW        EM
SSB         0
LB         1.00 Hz
GB         0
PC         1.40

```

<sup>13</sup>C NMR of **1a**

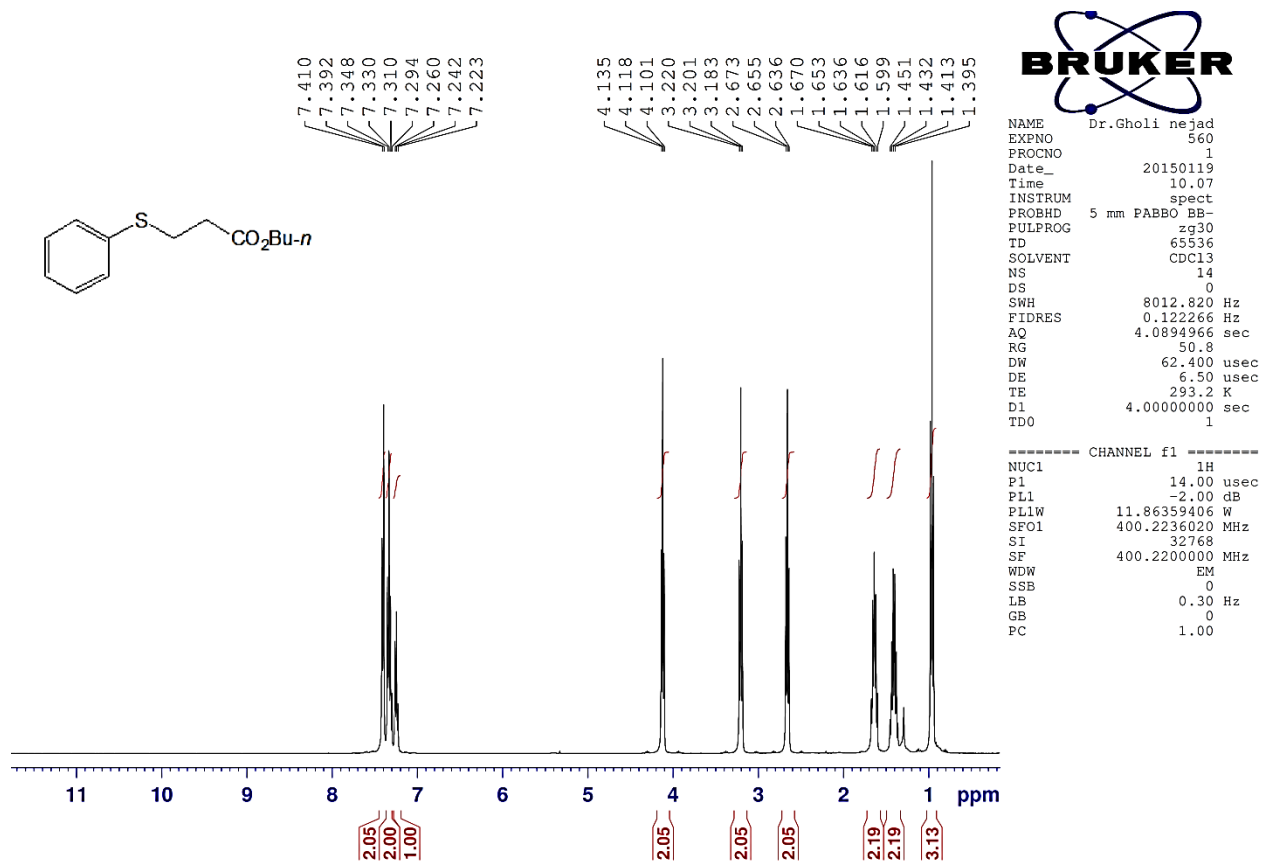

<sup>1</sup>H NMR of **1b**

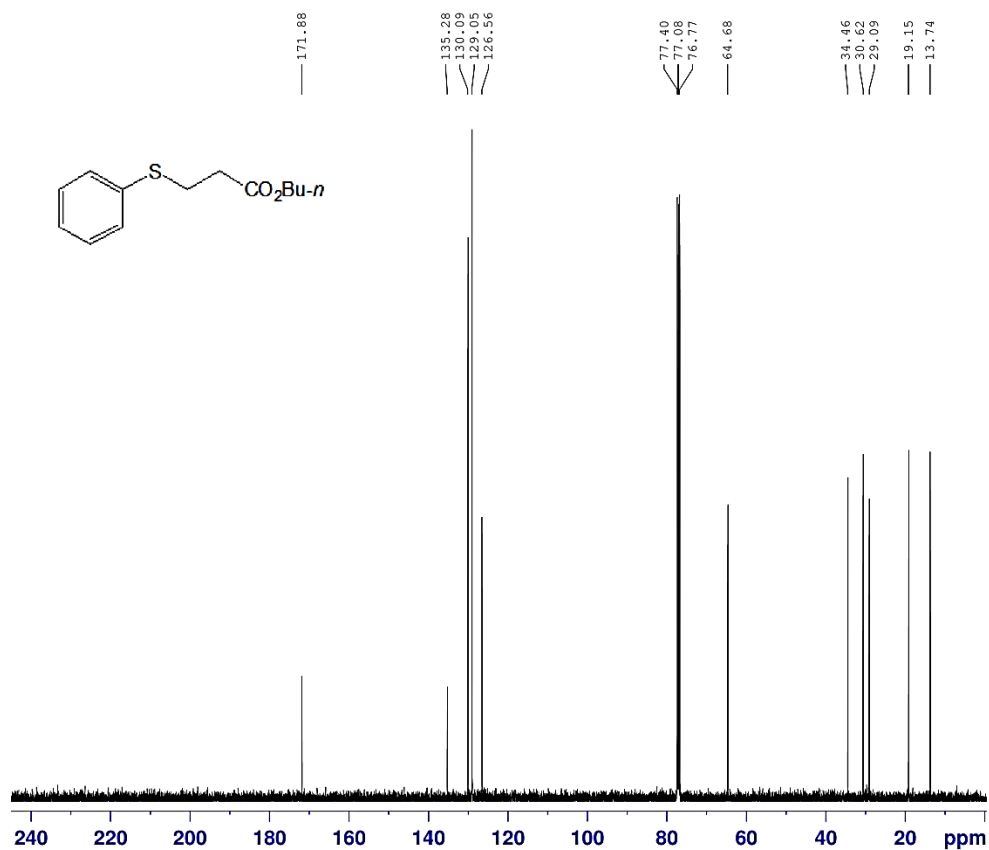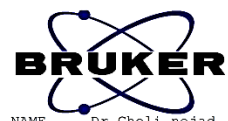

Dr.Gholi nejad

```

NAME      Dr.Gholi nejad
EXPNO     561
PROCNO    1
Date_     20150119
Time      10.10
INSTRUM   spect
PROBHD    5 mm PABBO BB-
PULPROG   zgpg30
TD        65536
SOLVENT   CDCl3
NS        100
DS        0
SWH       25252.525 Hz
FIDRES    0.385323 Hz
AQ        1.2976629 sec
RG        2050
DW        19.800 usec
DE        6.50 usec
TE        293.3 K
D1        2.00000000 sec
D11       0.03000000 sec
TD0       1

```

```

===== CHANNEL f1 =====
NUC1      13C
P1        9.00 usec
PL1       -0.90 dB
PL1W      42.02801895 W
SFO1      100.6479784 MHz

```

```

===== CHANNEL f2 =====
CPDPRG2   waltz16
NUC2      1H
PCPD2     90.00 usec
PL2       -2.00 dB
PL12      14.16 dB
PL13      17.90 dB
PL2W      11.86359406 W
PL12W     0.28722104 W
PL13W     0.12139934 W
SFO2      400.2216009 MHz
SI        32768
SF        100.6353990 MHz
WDW       EM
SSB       0
LB        1.00 Hz
GB        0
PC        1.40

```

<sup>13</sup>C NMR of **1b**

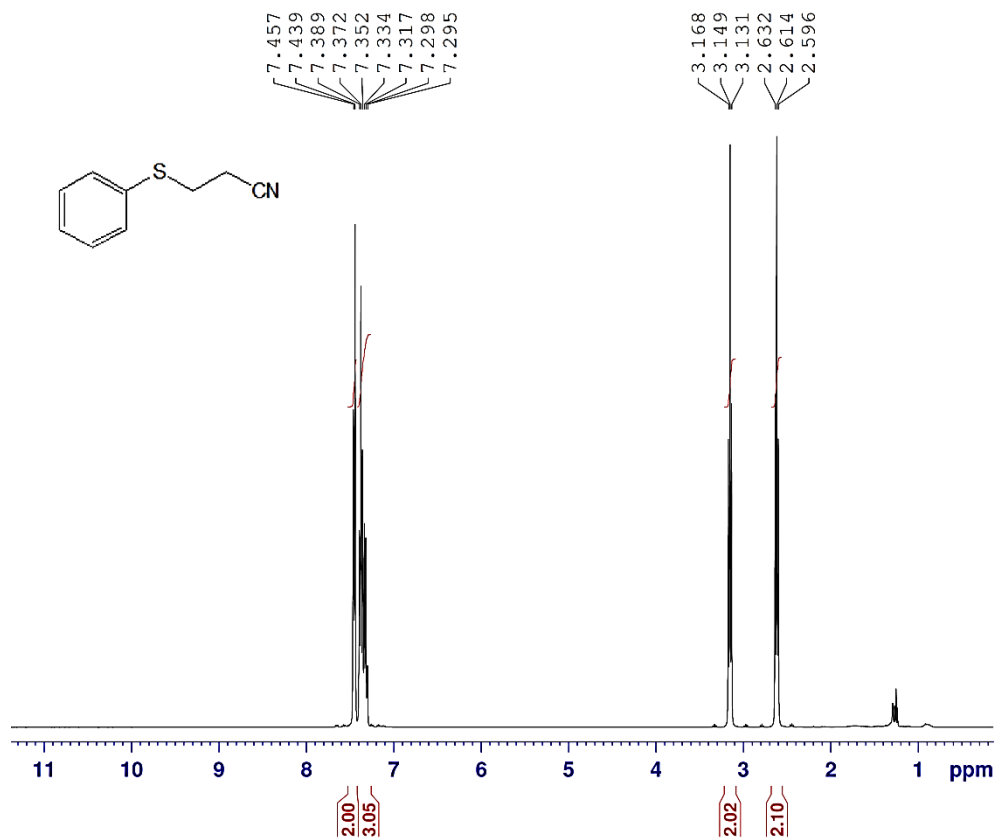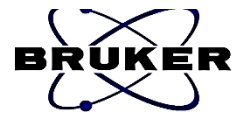

NAME Dr.Gholi nejad  
 EXPNO 562  
 PROCNO 1  
 Date\_ 20150119  
 Time 10.21  
 INSTRUM spect  
 PROBHD 5 mm PABBO BB-  
 PULPROG zg30  
 TD 65536  
 SOLVENT CDCl3  
 NS 14  
 DS 0  
 SWH 8012.820 Hz  
 FIDRES 0.122266 Hz  
 AQ 4.0894966 sec  
 RG 50.8  
 DW 62.400 usec  
 DE 6.50 usec  
 TE 293.2 K  
 D1 4.0000000 sec  
 TD0 1

----- CHANNEL f1 -----  
 NUC1 1H  
 P1 14.00 usec  
 PL1 -2.00 dB  
 PL1W 11.86359406 W  
 SFO1 400.2236020 MHz  
 SI 32768  
 SF 400.2200000 MHz  
 WDW EM  
 SSB 0  
 LB 0.30 Hz  
 GB 0  
 PC 1.00

<sup>1</sup>H NMR of 1c

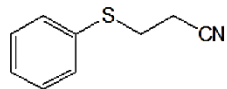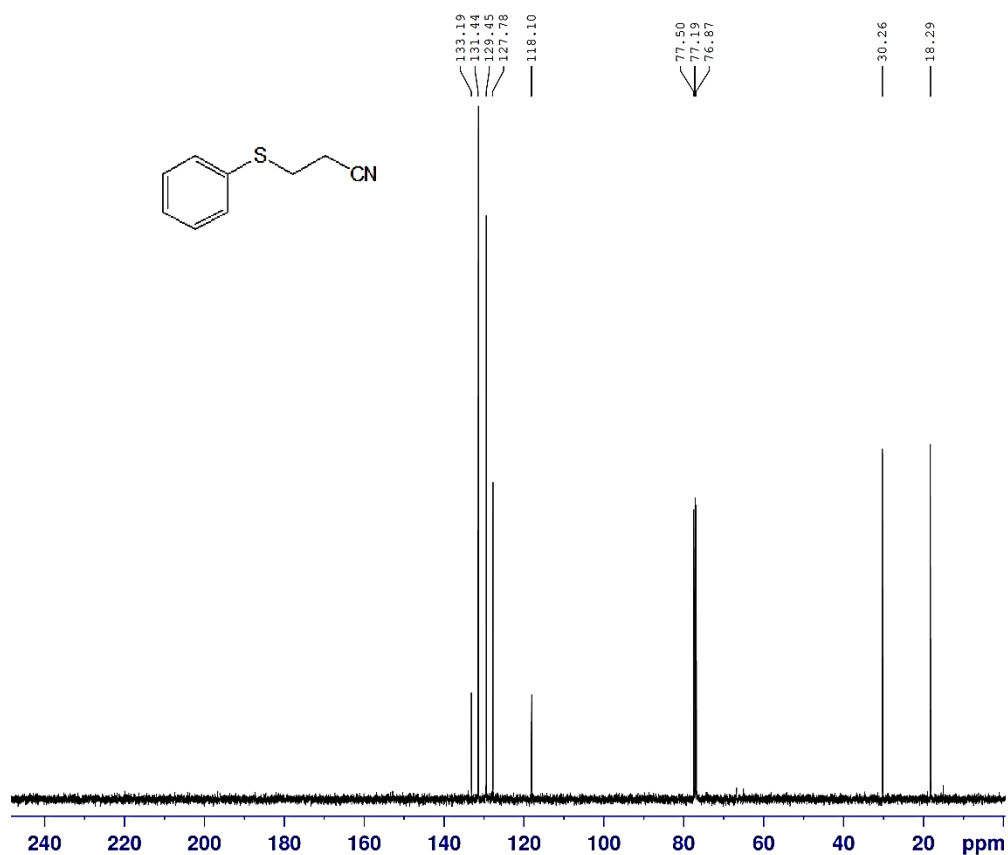

<sup>13</sup>C NMR of **1c**

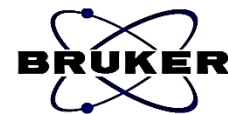

```

NAME      Dr.Gholi nejad
EXPNO     563
PROCNO    1
Date_     20150119
Time      10.25
INSTRUM   spect
PROBHD    5 mm PABBO BB-
PULPROG   zgpg30
TD         65536
SOLVENT   CDCl3
NS         40
DS         0
SWH       25252.525 Hz
FIDRES    0.385323 Hz
AQ         1.2976629 sec
RG         2050
DW         19.800 use
DE         6.50 use
TE         293.2 K
D1         2.0000000 sec
D11        0.0300000 sec
TDO        1
  
```

```

===== CHANNEL f1 =====
NUC1      13C
P1         9.00 use
PL1        -0.90 dB
PL1W      42.02801895 W
SFO1      100.6479784 MHz
  
```

```

===== CHANNEL f2 =====
CPDPRG2   waltz16
NUC2       1H
PCPD2     90.00 use
PL2        -2.00 dB
PL12       14.16 dB
PL13       17.90 dB
PL2W      11.86359406 W
PL12W     0.28722104 W
PL13W     0.12139934 W
SFO2      400.2216009 MHz
SI         32768
SF         100.6353990 MHz
WDW        EM
SSB         0
LB          1.00 Hz
GB          0
PC          1.40
  
```

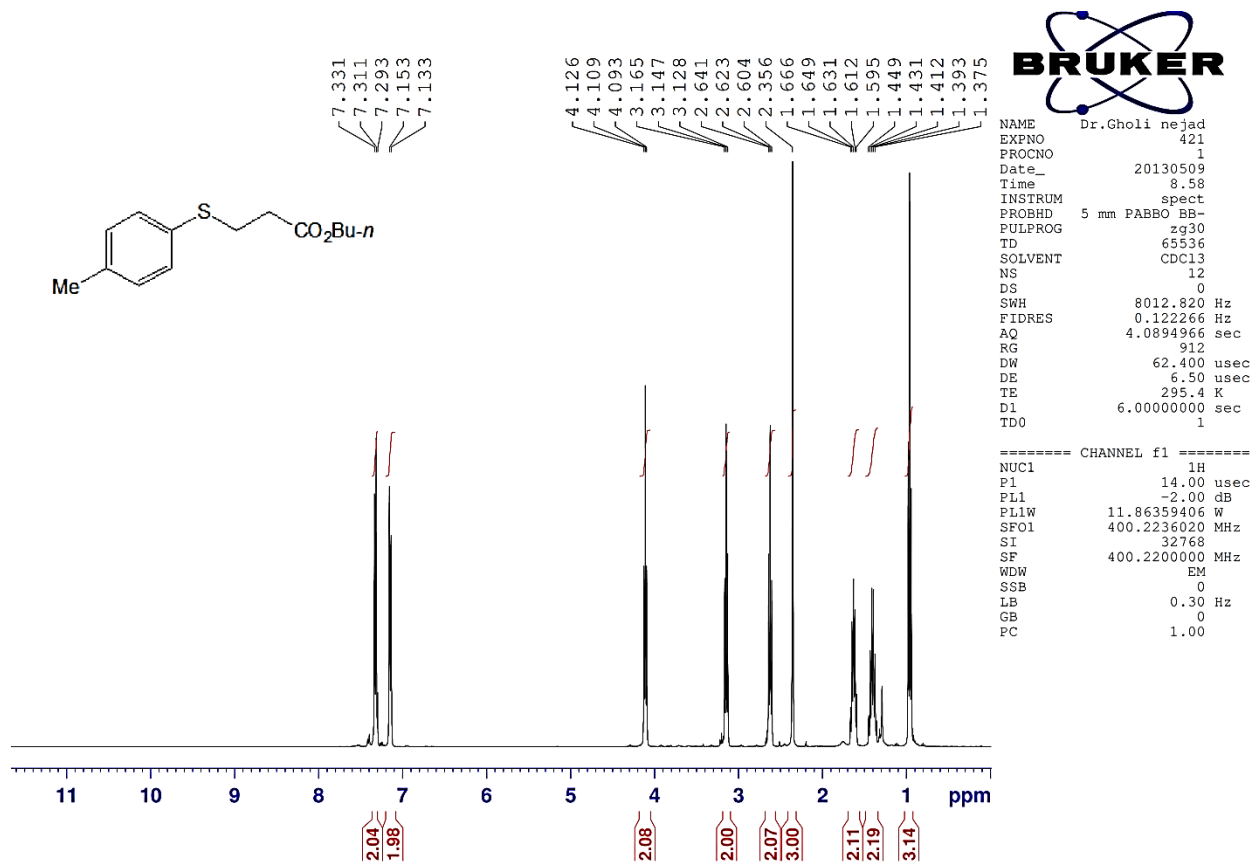

<sup>1</sup>H NMR of 1d



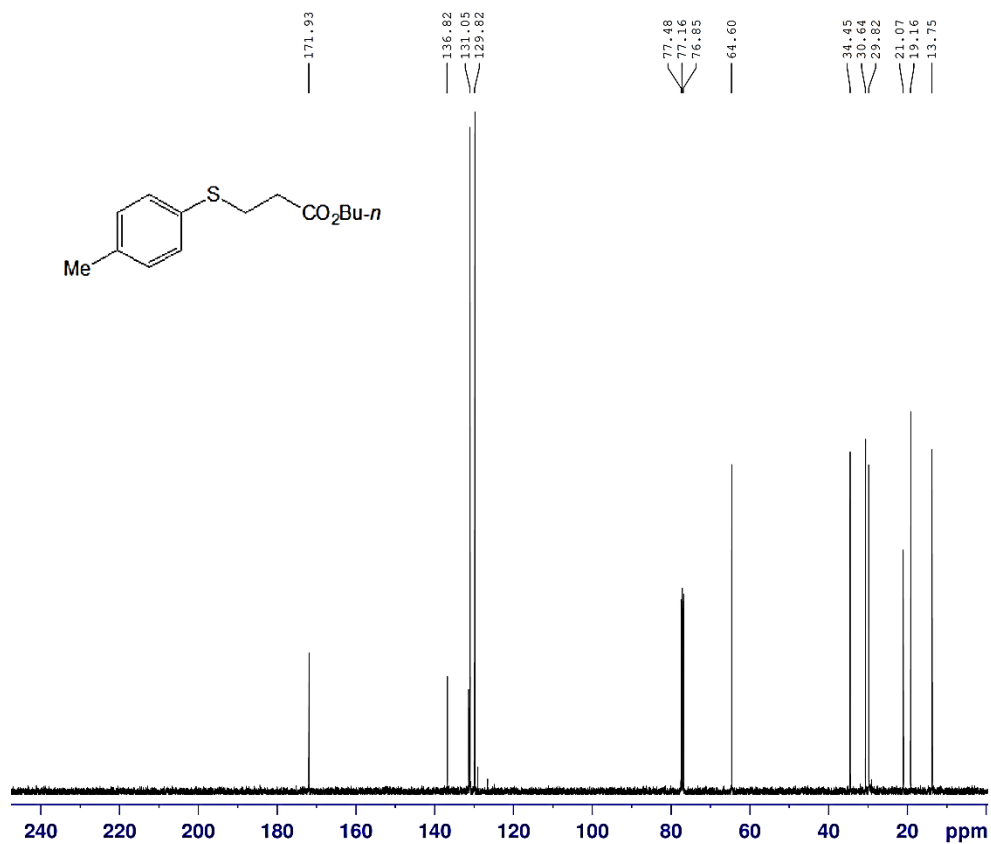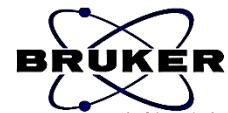

NAME Dr.Gholi nejad  
 EXPNO 423  
 PROCNO 1  
 Date\_ 20130511  
 Time 8.51  
 INSTRUM spect  
 PROBHD 5 mm PABBO BB-  
 PULPROG zgpg30  
 ID 65536  
 SOLVENT CDCl3  
 NS 40  
 DS 0  
 SWH 25252.525 Hz  
 FIDRES 0.385323 Hz  
 AQ 1.2976629 sec  
 RG 2050  
 DW 19.800 usec  
 DE 6.50 usec  
 TE 292.8 K  
 D1 2.00000000 sec  
 D11 0.03000000 sec  
 TD0 1

===== CHANNEL f1 =====  
 NUC1 13C  
 P1 9.00 usec  
 PL1 -0.90 dB  
 PL1W 42.02801895 W  
 SFO1 100.6479784 MHz

===== CHANNEL f2 =====  
 CPDPRG2 waltz16  
 NUC2 1H  
 PCPD2 90.00 usec  
 PL2 -2.00 dB  
 PL12 14.16 dB  
 PL13 17.90 dB  
 PL2W 11.86359406 W  
 PL12W 0.28722104 W  
 PL13W 0.12139934 W  
 SFO2 400.2216009 MHz  
 SI 32768  
 SF 100.6353990 MHz  
 WDW EM  
 SSB 0  
 LB 1.00 Hz  
 GB 0  
 PC 1.40

<sup>13</sup>C NMR of 1d

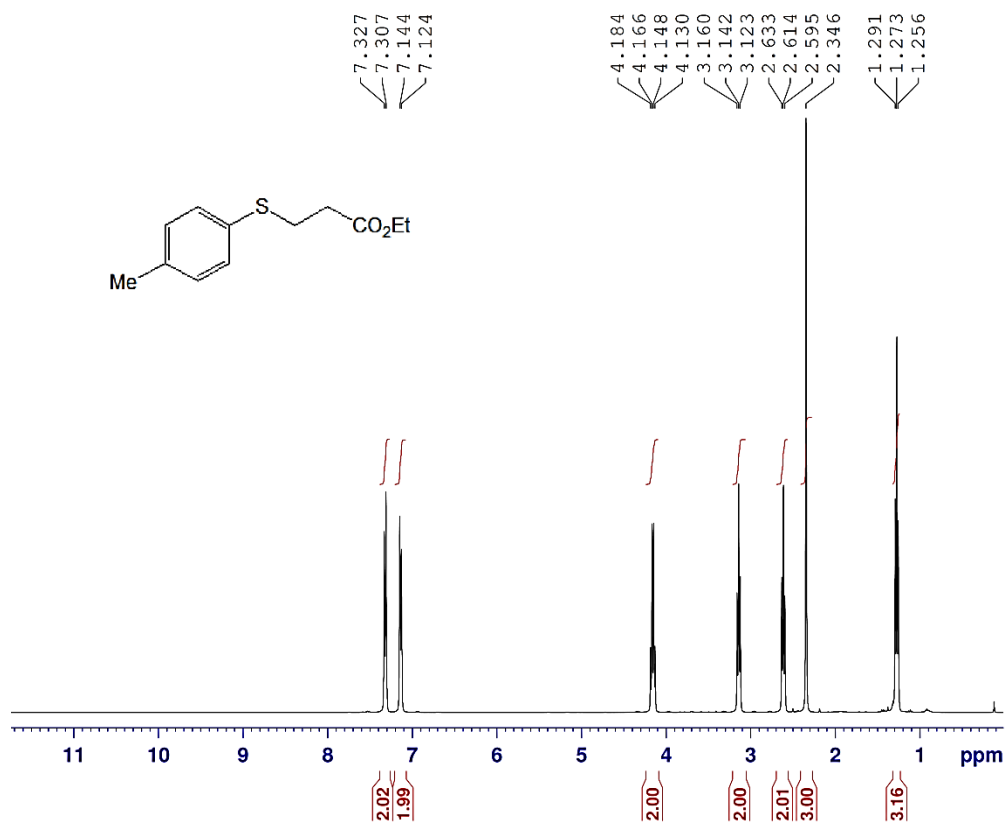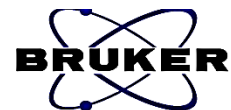

NAME Dr.Gholi nejad  
 EXPNO 420  
 PROCNO 1  
 Date\_ 20130509  
 Time 8.52  
 INSTRUM spect  
 PROBHD 5 mm PABBO BB-  
 PULPROG zg30  
 TD 65536  
 SOLVENT CDCl3  
 NS 10  
 DS 0  
 SWH 8012.820 Hz  
 FIDRES 0.122266 Hz  
 AQ 4.0894966 sec  
 RG 287  
 DW 62.400 usec  
 DE 6.50 usec  
 TE 295.4 K  
 D1 6.0000000 sec  
 TDO 1

===== CHANNEL f1 =====  
 NUC1 1H  
 P1 14.00 usec  
 PL1 -2.00 dB  
 PL1W 11.86359406 W  
 SFO1 400.2236020 MHz  
 SI 32768  
 SF 400.2200000 MHz  
 WDW EM  
 SSB 0  
 LB 0.30 Hz  
 GB 0  
 PC 1.00

<sup>1</sup>H NMR of 1e

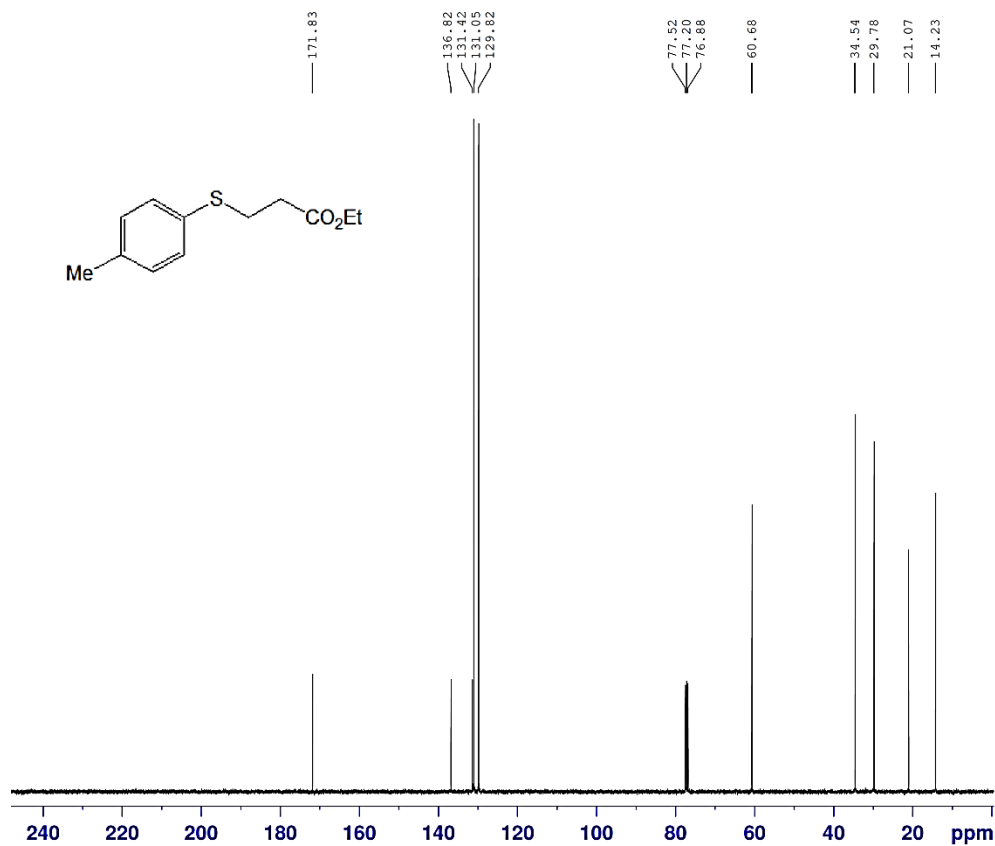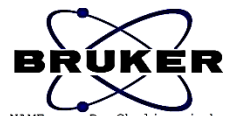

Dr.Gholi nejad  
 NAME  
 EXPNO 424  
 PROCNO 1  
 Date\_ 20130511  
 Time 9.03  
 INSTRUM spect  
 PROBHD 5 mm PABBO BB-  
 PULPROG zgpg30  
 TD 65536  
 SOLVENT CDCl3  
 NS 79  
 DS 0  
 SWH 25252.525 Hz  
 FIDRES 0.385323 Hz  
 AQ 1.2976629 sec  
 RG 2050  
 DW 19.800 usec  
 DE 6.50 usec  
 TE 293.1 K  
 D1 2.0000000 sec  
 D11 0.0300000 sec  
 TD0 1

===== CHANNEL f1 =====  
 NUC1 13C  
 P1 9.00 usec  
 PL1 -0.90 dB  
 PL1W 42.02801895 W  
 SFO1 100.6479784 MHz

===== CHANNEL f2 =====  
 CPDPRG2 waltz16  
 NUC2 1H  
 PCPD2 90.00 usec  
 PL2 -2.00 dB  
 PL12 14.16 dB  
 PL13 17.90 dB  
 PL2W 11.86359406 W  
 PL12W 0.28722104 W  
 PL13W 0.12139934 W  
 SFO2 400.2216009 MHz  
 SI 32768  
 SF 100.6353990 MHz  
 WDW EM  
 SSB 0  
 LB 1.00 Hz  
 GB 0  
 PC 1.40

<sup>13</sup>C NMR of 1e

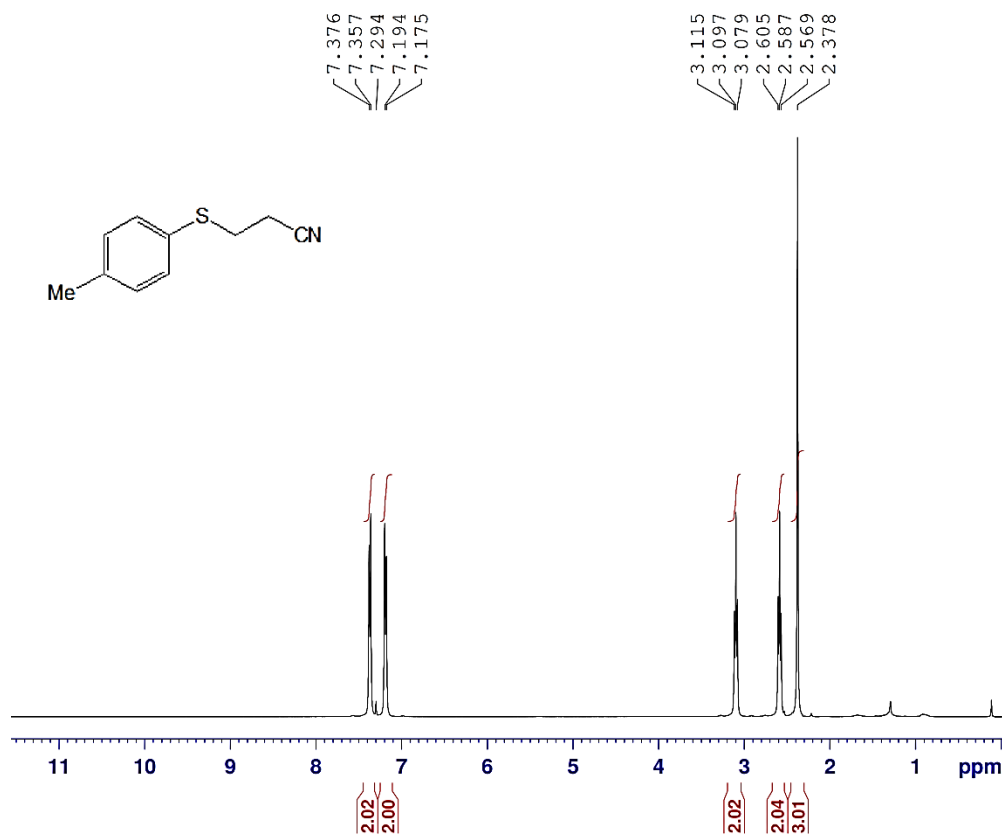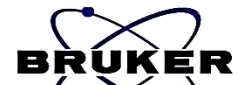

```

NAME      Dr.Gholi nejad
EXPNO     564
PROCNO    1
Date_     20150119
Time      10.31
INSTRUM   spect
PROBHD    5 mm PABBO BB-
PULPROG   zg30
TD         65536
SOLVENT   CDCl3
NS         14
DS         0
SWH       8012.820 Hz
FIDRES    0.122266 Hz
AQ         4.0894966 sec
RG         50.8
DW         62.400 usec
DE         6.50 usec
TE         293.2 K
D1         4.0000000 sec
TD0        1
  
```

```

===== CHANNEL f1 =====
NUC1      1H
P1        14.00 usec
PL1       -2.00 dB
PL1W      11.86359406 W
SF01      400.2236020 MHz
SI         32768
SF        400.2200000 MHz
WDW        EM
SSB        0
LB         0.30 Hz
GB         0
PC         1.00
  
```

<sup>1</sup>H NMR of 1f

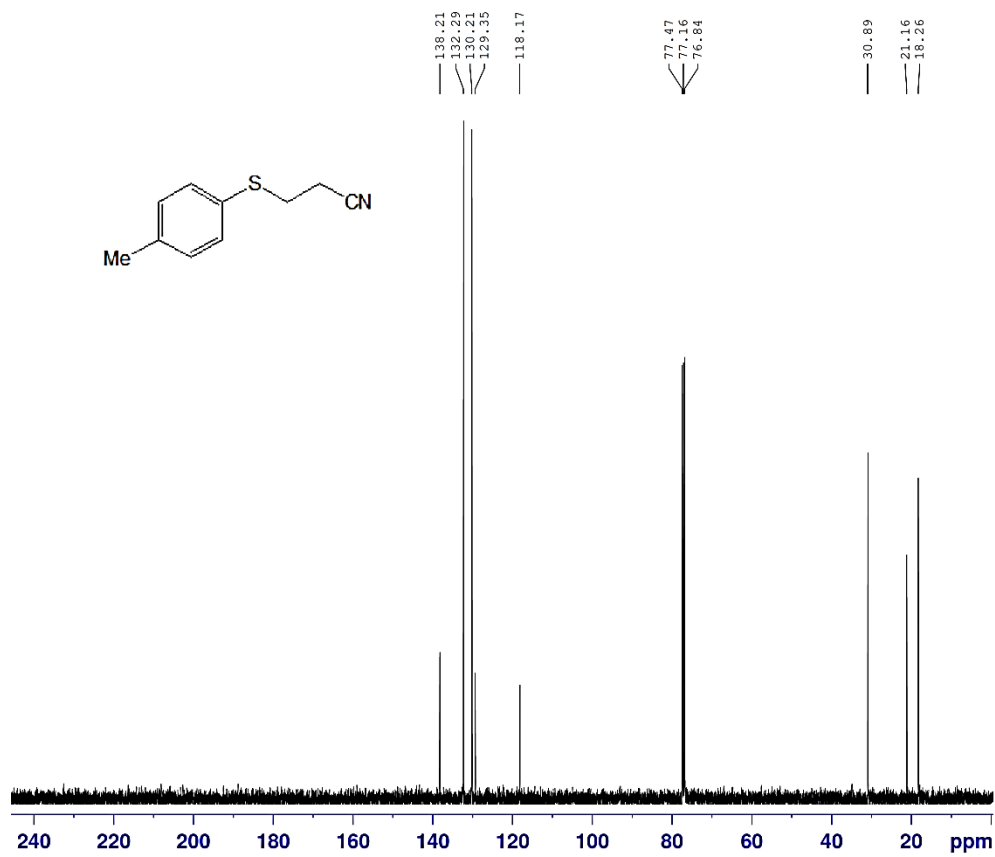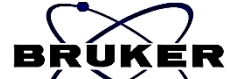

```

NAME      Dr.Gholi nejad
EXPNO     565
PROCNO    1
Date_     20150119
Time      10.34
INSTRUM   spect
PROBHD    5 mm PABBO BB-
PULPROG   zgpg30
TD         65536
SOLVENT   CDCl3
NS         30
DS         0
SWH       25252.525 Hz
FIDRES    0.385323 Hz
AQ         1.2976629 sec
RG         2050
DW         19.800 usec
DE         6.50 usec
TE         293.3 K
D1         2.0000000 sec
D11        0.0300000 sec
TD0        1
  
```

```

===== CHANNEL f1 =====
NUC1      13C
P1         9.00 usec
PL1        -0.90 dB
PLLW      42.02801895 W
SFO1      100.6479784 MHz
  
```

```

===== CHANNEL f2 =====
CPDPRG2   waltz16
NUC2       1H
PCPD2     90.00 usec
PL2        -2.00 dB
PL12       14.16 dB
PL13       17.90 dB
PL2W      11.86359406 W
PL12W     0.28722104 W
PL13W     0.12139934 W
SFO2      400.2216009 MHz
SI         32768
SF         100.6353990 MHz
WDW        EM
SSB         0
LB          1.00 Hz
GB          0
PC          1.40
  
```

<sup>13</sup>C NMR of **1f**

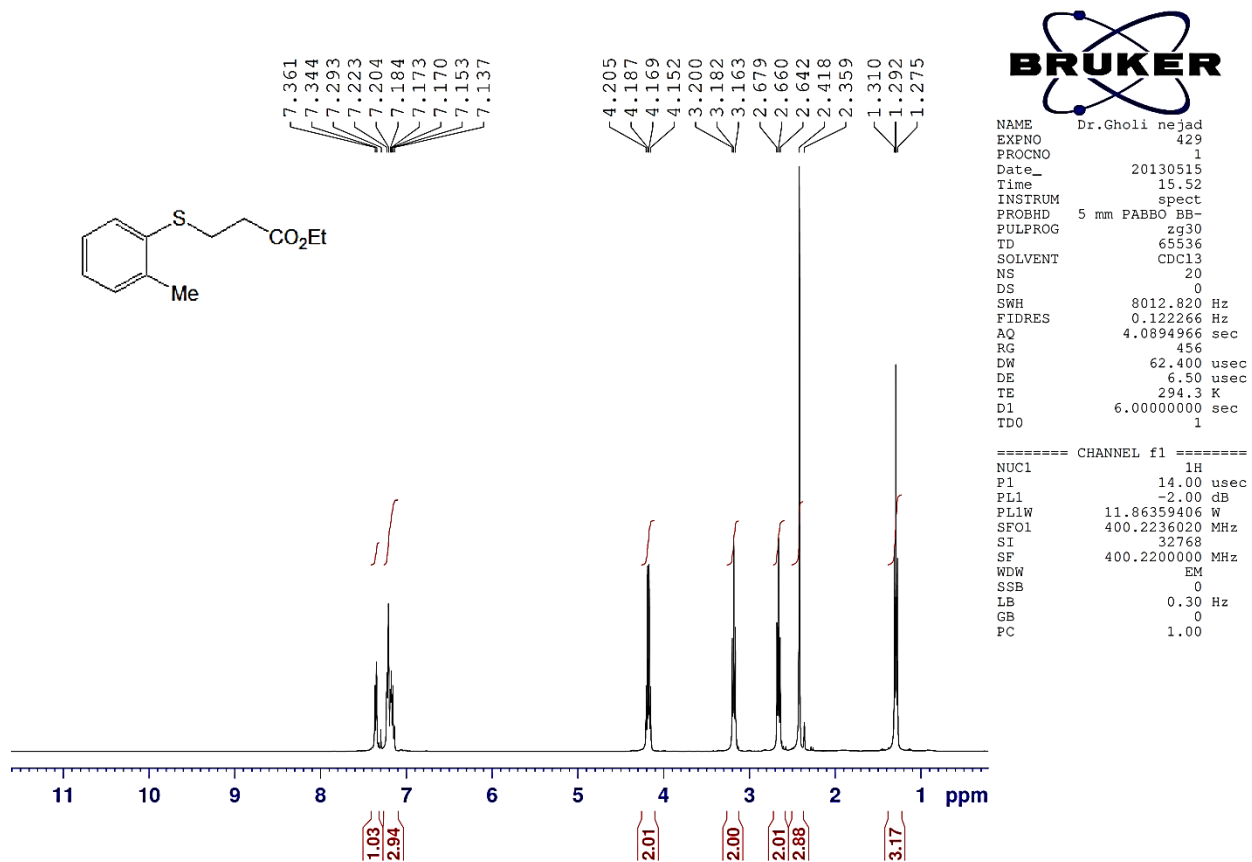

<sup>1</sup>H NMR of **1g**

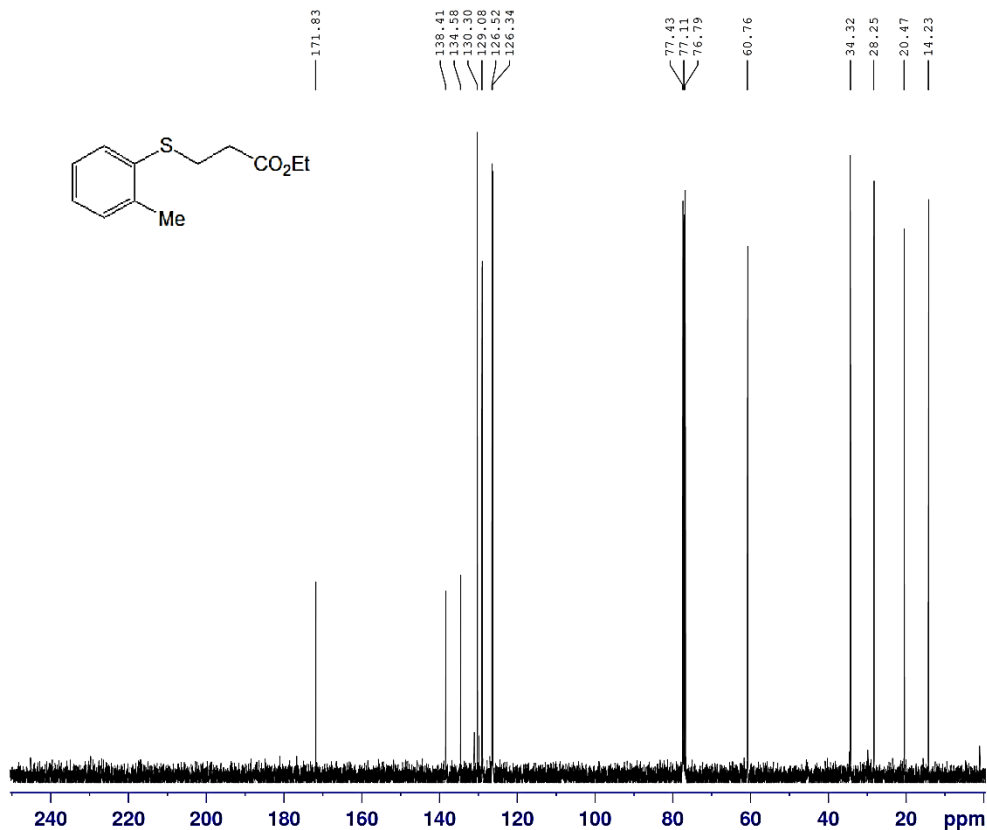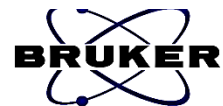

NAME Dr.Gholi nejad  
 EXPNO 430  
 PROCNO 1  
 Date\_ 20130515  
 Time 15.58  
 INSTRUM spect  
 PROBHD 5 mm PABBO BB-  
 PULPROG zgpg30  
 TD 65536  
 SOLVENT CDCl3  
 NS 61  
 DS 0  
 SWH 25252.525 Hz  
 FIDRES 0.385323 Hz  
 AQ 1.2976629 sec  
 RG 2050  
 DW 19.800 usec  
 DE 6.50 usec  
 TE 294.9 K  
 D1 2.00000000 sec  
 D11 0.03000000 sec  
 TD0 1

===== CHANNEL f1 =====  
 NUC1 13C  
 P1 9.00 usec  
 PL1 -0.50 dB  
 PL1W 42.02801895 W  
 SFO1 100.6479784 MHz

===== CHANNEL f2 =====  
 CPDPRG2 waltz16  
 NUC2 1H  
 PCPD2 90.00 usec  
 PL2 -2.00 dB  
 PL12 14.16 dB  
 PL13 17.90 dB  
 PL2W 11.86359406 W  
 PL12W 0.28722104 W  
 PL13W 0.12139934 W  
 SFO2 400.2216009 MHz  
 SI 32768  
 SF 100.6353990 MHz  
 WDW EM  
 SSB 0  
 LB 1.00 Hz  
 GB 0  
 FC 1.40

<sup>13</sup>C NMR of 1g

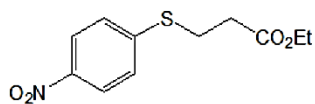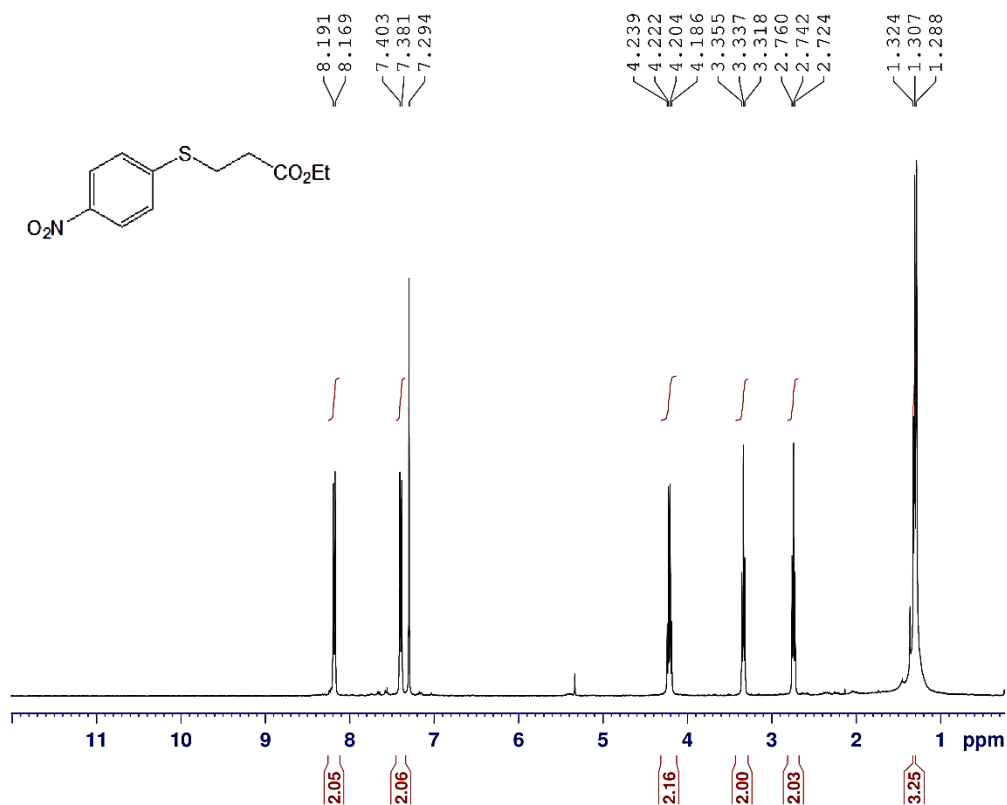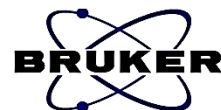

```

NAME      Dr.Gholi nejad
EXPNO     558
PROCNO    1
Date_     20150119
Time      9.59
INSTRUM   spect
PROBHD    5 mm PABBO BB-
PULPROG   zg30
TD         65536
SOLVENT   CDCl3
NS         14
DS         0
SWH       8012.820 Hz
FIDRES    0.122266 Hz
AQ         4.0894966 sec
RG         161
DW         62.400 usec
DE         6.50 usec
TE         293.2 K
D1         4.0000000 sec
TD0        1
===== CHANNEL f1 =====
NUC1      1H
P1        14.00 usec
PL1       -2.00 dB
PL1W      11.86359406 W
SF01      400.2236020 MHz
SI         32768
SF         400.2200000 MHz
WDW        EM
SSB        0
LB         0.30 Hz
GB         0
PC         1.00
  
```

<sup>1</sup>H NMR of 1h



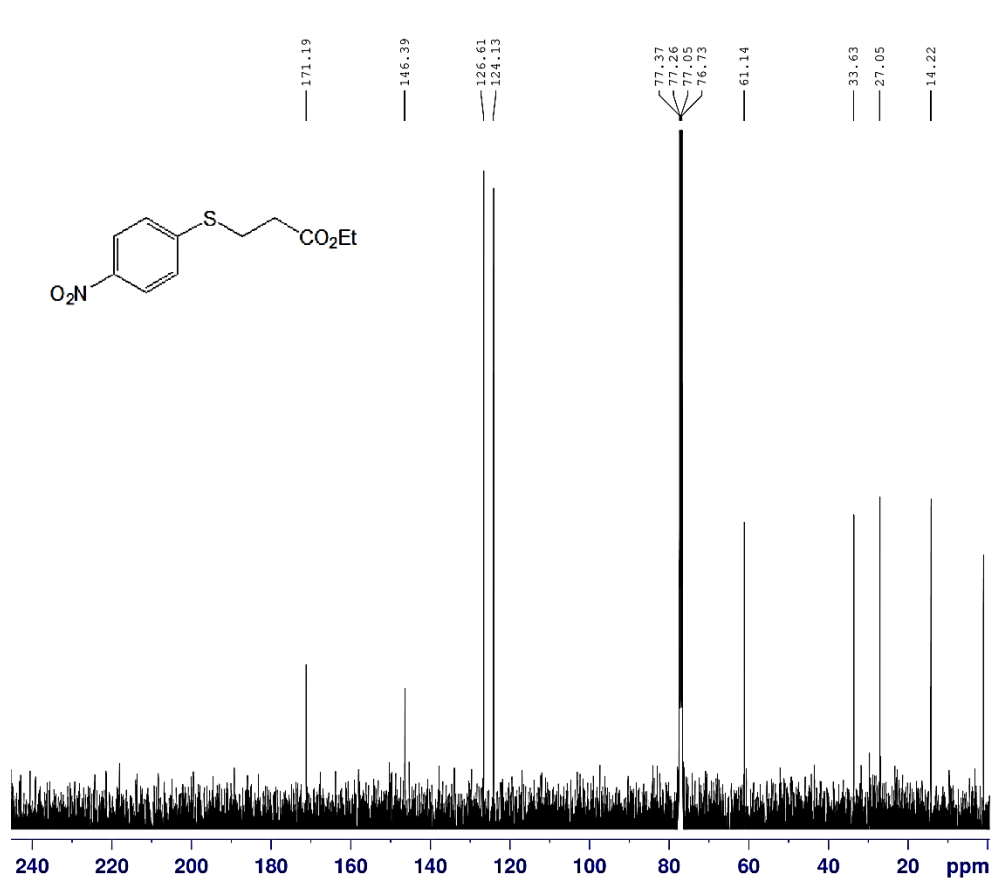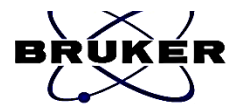

```

NAME      Dr.Gholi nejad
EXPNO     559
PROCNO    1
Date_     20150119
Time      9.28
INSTRUM   spect
PROBHD    5 mm PABBO BB-
PULPROG   zgpg30
TD         65536
SOLVENT   CDCl3
NS         501
DS         0
SWH        25252.525 Hz
FIDRES     0.385323 Hz
AQ         1.2976629 sec
RG         2050
DW         19.800 usec
DE         6.50 usec
TE         293.3 K
D1         2.0000000 sec
D11        0.0300000 sec
TD0        1

```

```

===== CHANNEL f1 =====
NUC1       13C
P1         9.00 usec
PL1        -0.90 dB
PL1W       42.02801895 W
SFO1       100.6479784 MHz

```

```

===== CHANNEL f2 =====
CPDPRG2   waltz16
NUC2       1H
PCPD2     90.00 usec
PL2        -2.00 dB
PL12       14.16 dB
PL13       17.90 dB
PL2W       11.86359406 W
PL12W      0.28722104 W
PL13W      0.12139934 W
SFO2       400.2216009 MHz
SI         32768
SF         100.6353990 MHz
WDW        EM
SSB        0
LB         1.00 Hz
GB         0
PC         1.40

```

<sup>13</sup>C NMR of **1h**

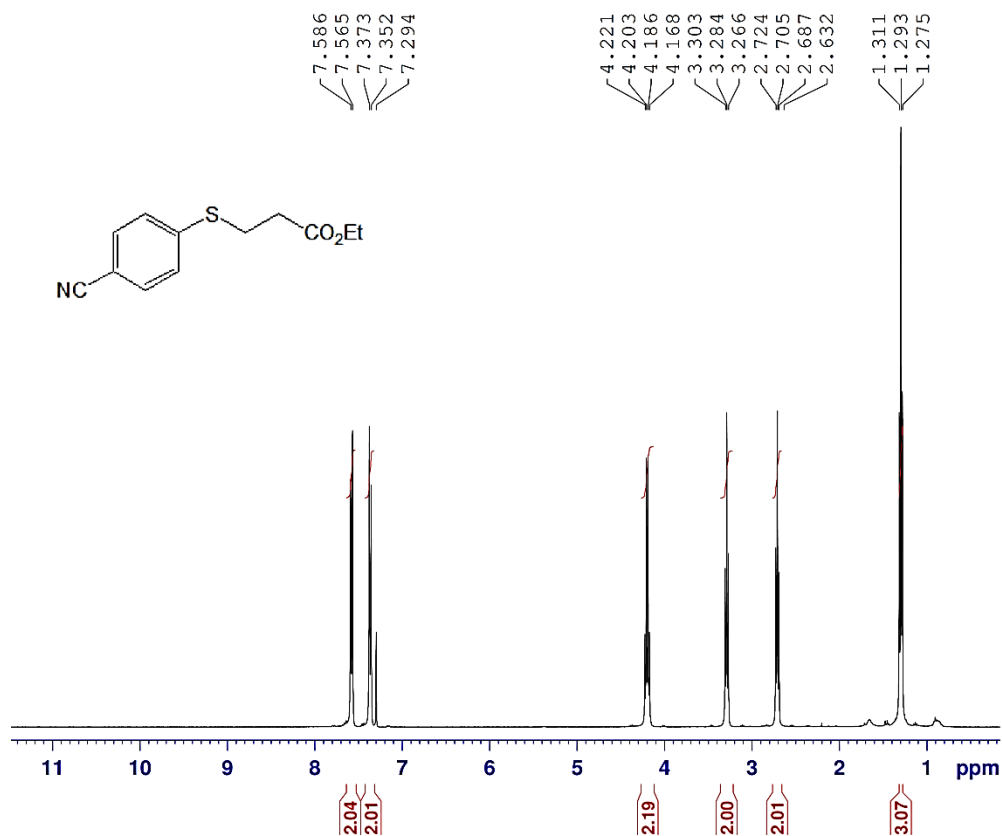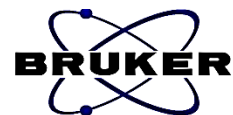

Dr. Gholi nejad  
 NAME  
 EXPNO 580  
 PROCNO 1  
 Date\_ 20150128  
 Time 9.37  
 INSTRUM spect  
 PROBHD 5 mm PABBO EB-  
 PULPROG zg30  
 TD 65536  
 SOLVENT CDC13  
 NS 10  
 DS 0  
 SWH 8012.820 Hz  
 FIDRES 0.122266 Hz  
 AQ 4.0894966 sec  
 RG 161  
 DW 62.400 usec  
 DE 6.50 usec  
 TE 294.8 K  
 D1 4.0000000 sec  
 TDO 1

===== CHANNEL f1 =====  
 NUC1 1H  
 P1 14.00 usec  
 PL -2.00 dB  
 PLW 11.86359406 W  
 SFO1 400.2236020 MHz  
 SI 32768  
 SF 400.2200000 MHz  
 WDW EM  
 SSB 0  
 LB 0.30 Hz  
 GB 0  
 PC 1.00

<sup>1</sup>H NMR of **1i**

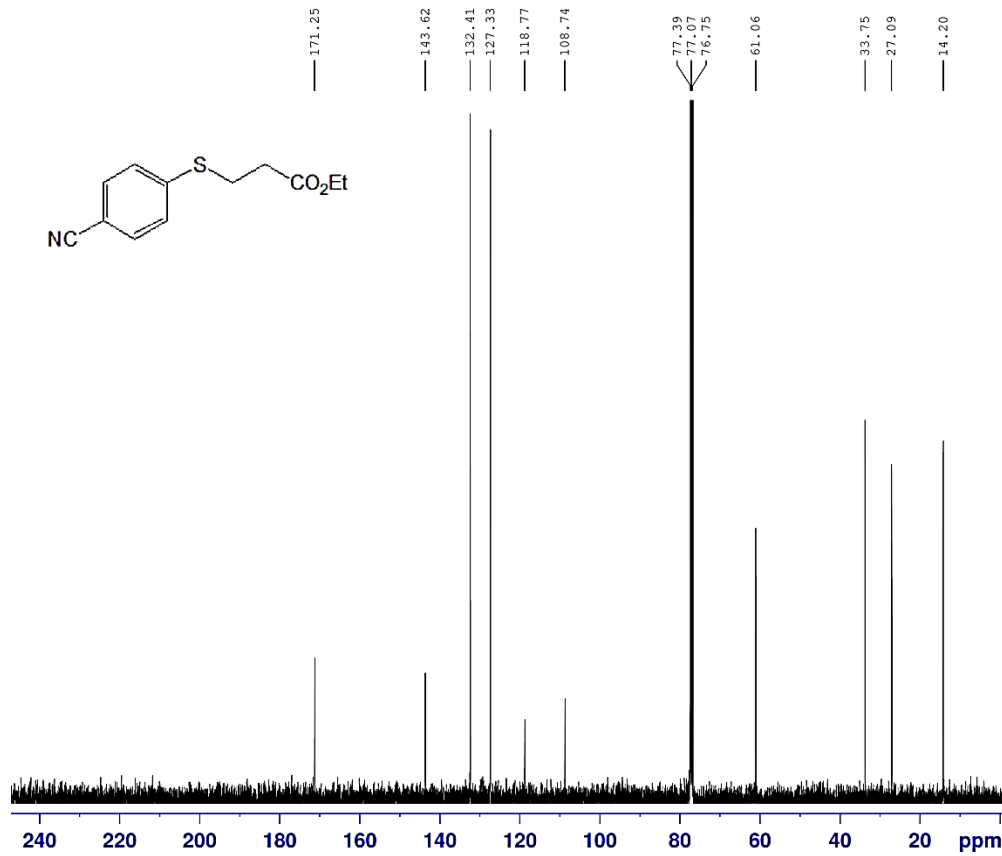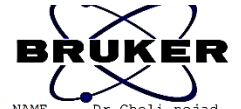

Dr.Gholi nejad  
 NAME  
 EXPNO 581  
 PROCNO 1  
 Date\_ 20150128  
 Time 9.41  
 INSTRUM spect  
 PROBHD 5 mm PABBO BB-  
 PULPROG zgpg30  
 TD 65536  
 SOLVENT CDCl3  
 NS 120  
 DS 0  
 SWH 25252.525 Hz  
 FIDRES 0.385323 Hz  
 AQ 1.2976629 sec  
 RG 2050  
 DW 19.800 use  
 DE 6.50 use  
 TE 295.0 K  
 D1 2.00000000 sec  
 D11 0.03000000 sec  
 TDO 1

===== CHANNEL f1 =====  
 NUC1 13C  
 P1 9.00 use  
 PL1 -0.90 dB  
 PL1W 42.02801895 W  
 SFO1 100.6479784 MHz

===== CHANNEL f2 =====  
 CPDPRG2 waltz16  
 NUC2 1H  
 PCPD2 90.00 use  
 PL2 -2.00 dB  
 PL12 14.16 dB  
 PL13 17.90 dB  
 PL2W 11.86359406 W  
 PL12W 0.28722104 W  
 PL13W 0.12139934 W  
 SFO2 400.2216009 MHz  
 SI 32768  
 SF 100.6353990 MHz  
 WDW EM  
 SSB 0  
 LB 1.00 Hz  
 GB 0  
 PC 1.40

<sup>13</sup>C NMR of 1i

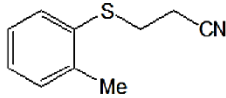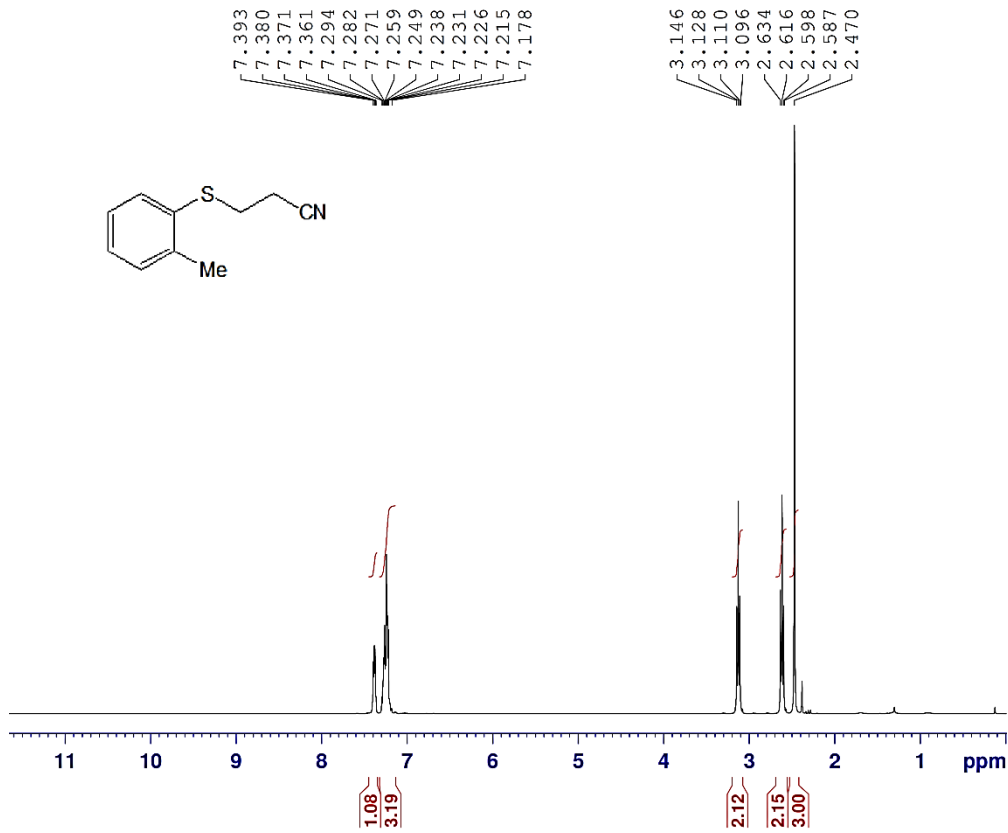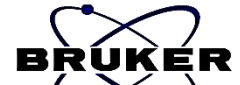

```

NAME      Dr.Gholi nejad
EXPNO     572
PROCNO    1
Date_     20150121
Time      13.33
INSTRUM   spect
PROBHD    5 mm PABBO BB-
PULPROG   zg30
TD         65536
SOLVENT   CDCl3
NS         10
DS         0
SWH        8012.820 Hz
FIDRES     0.122266 Hz
AQ         4.0894966 sec
RG         36
DW         62.400 usec
DE         6.50 usec
TE         293.8 K
D1         4.00000000 sec
TDO        1
  
```

```

===== CHANNEL f1 =====
NUC1      1H
P1         14.00 usec
PL1        -2.00 dB
PL1W      11.86359406 W
SFO1      400.2236020 MHz
SI         32768
SF         400.2200000 MHz
WDW        EM
SSB         0
LB         0.30 Hz
GB         0
PC         1.00
  
```

<sup>1</sup>H NMR of 1j

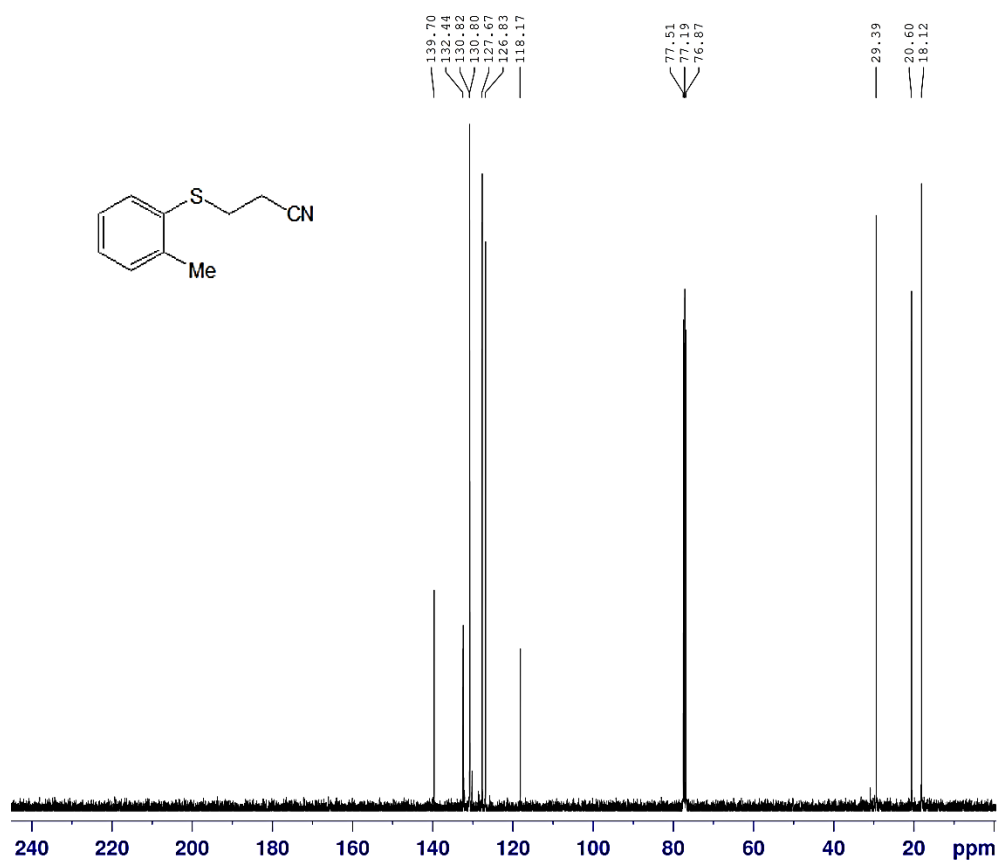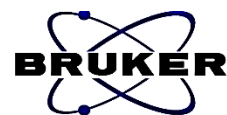

```

NAME      Dr.Gholi nejad
EXPNO     573
PROCNO    1
Date_     20150121
Time      13.37
INSTRUM   spect
PROBHD    5 mm PABBO BB-
PULPROG   zgpg30
TD        65536
SOLVENT   CDCl3
NS        52
DS        0
SWH       25252.525 Hz
FIDRES    0.385323 Hz
AQ        1.2976629 sec
RG        2050
DW        19.800 usec
DE        6.50 usec
TE        294.1 K
D1        2.00000000 sec
D11       0.03000000 sec
TD0       1

```

```

===== CHANNEL f1 =====
NUC1      13C
P1        9.00 usec
PL1       -0.90 dB
PL1W     42.02801895 W
SFO1     100.6479784 MHz

```

```

===== CHANNEL f2 =====
CPDPRG2   waltz16
NUC2      1H
PCPD2     90.00 usec
PL2       -2.00 dB
PL12     14.16 dB
PL13     17.90 dB
PL2W     11.86359406 W
PL12W    0.28722104 W
PL13W    0.12139934 W
SFO2     400.2216009 MHz
SI        32768
SF        100.6353990 MHz
WDW       EM
SSB       0
LB        1.00 Hz
GB        0
PC        1.40

```

<sup>13</sup>C NMR of **1j**

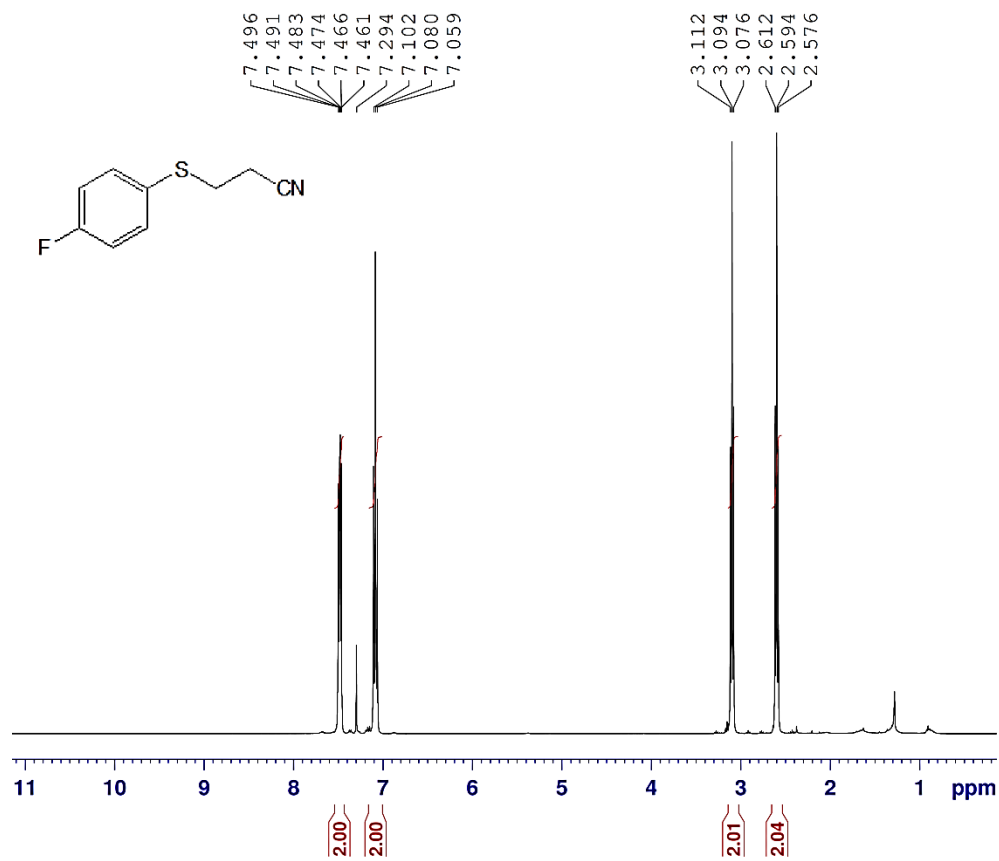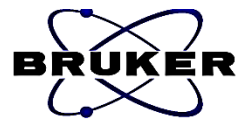

NAME Dr.Gholi nejad  
 EXPNO 570  
 PROCNO 1  
 Date\_ 20150121  
 Time 13.16  
 INSTRUM spect  
 PROBHD 5 mm PABBO BB-  
 PULPROG zg30  
 TD 65536  
 SOLVENT CDCl3  
 NS 10  
 DS 0  
 SWH 8012.820 Hz  
 FIDRES 0.122266 Hz  
 AQ 4.0894966 sec  
 RG 128  
 DW 62.400 use  
 DE 6.50 use  
 TE 293.7 K  
 D1 4.0000000 sec  
 TD0 1

----- CHANNEL f1 -----  
 NUC1 1H  
 P1 14.00 use  
 PL1 -2.00 dB  
 PL1W 11.86359406 W  
 SF01 400.2236020 MHz  
 SI 32768  
 SF 400.2200000 MHz  
 WDW EM  
 SSB 0  
 LB 0.30 Hz  
 GB 0  
 PC 1.00

<sup>1</sup>H NMR of 1k

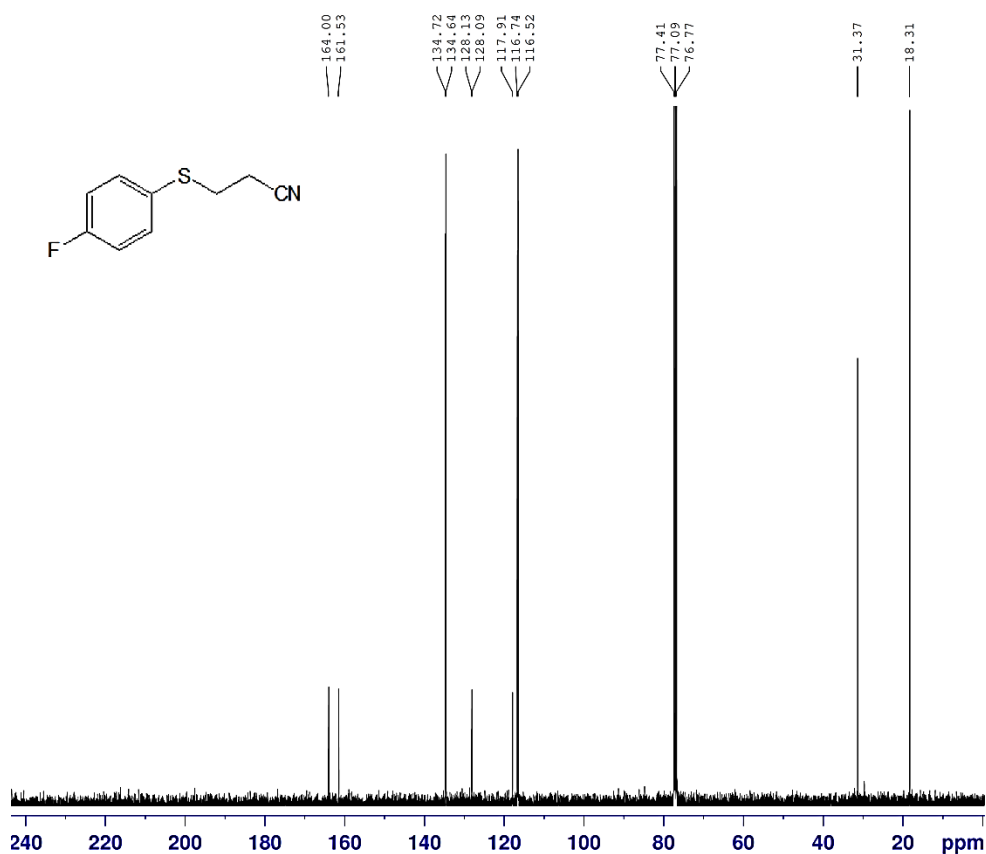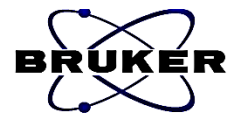

```

NAME      Dr.Gholi nejad
EXPNO     571
PROCNO    1
Date_     20150121
Time      13.18
INSTRUM   spect
PROBHD    5 mm PABBO BB-
PULPROG   zgpg30
TD         65536
SOLVENT   CDCl3
NS         190
DS         0
SWH        25252.525 Hz
FIDRES     0.385323 Hz
AQ         1.2976629 sec
RG         2050
DW         19.800 usec
DE         6.50 usec
TE         293.7 K
D1         2.0000000 sec
D11        0.0300000 sec
TD0        1
  
```

```

===== CHANNEL f1 =====
NUC1      13C
P1        9.00 usec
PL1       -0.90 dB
PL1W      42.02801895 W
SFO1      100.6479784 MHz
  
```

```

===== CHANNEL f2 =====
CPDPRG2   waltz16
NUC2      1H
PCPD2     90.00 usec
PL2       -2.00 dB
PL12      14.16 dB
PL13      17.90 dB
PL2W      11.86359406 W
PL12W     0.28722104 W
PL13W     0.12139934 W
SFO2      400.2216009 MHz
SI        32768
SF        100.6353990 MHz
WDW       EM
SSB       0
LB        1.00 Hz
GB        0
PC        1.40
  
```

<sup>13</sup>C NMR of 1k

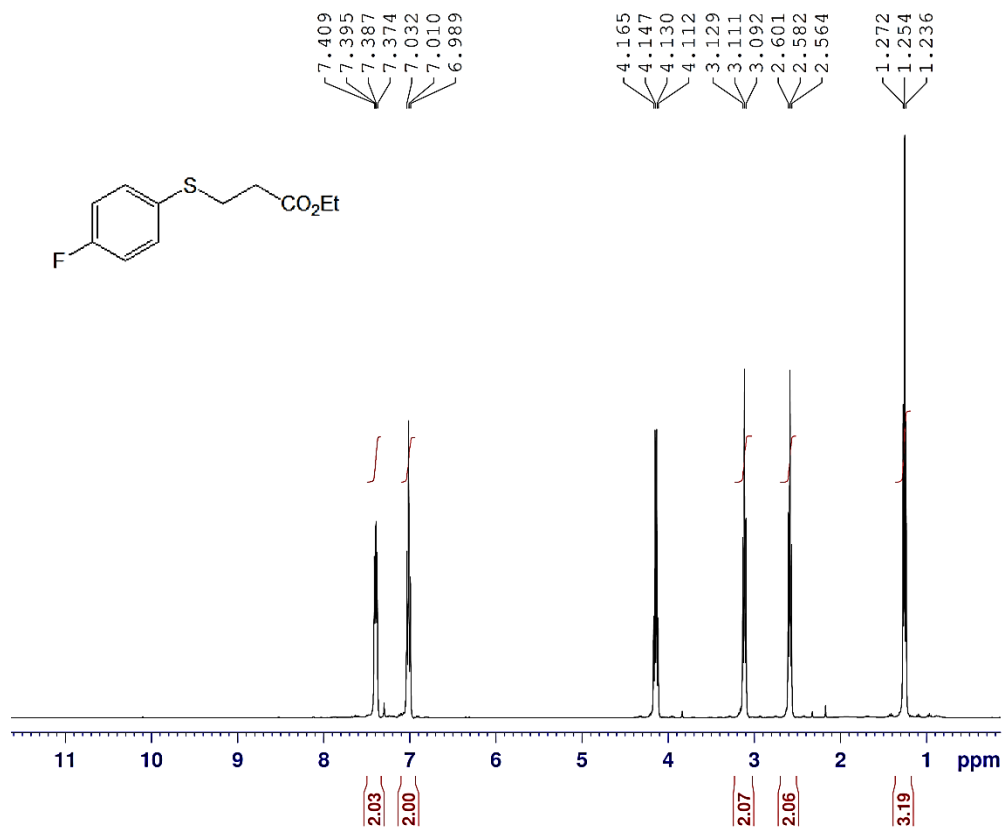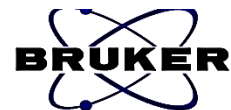

NAME Dr.Gholi nejad  
 EXPNO 508  
 PROCNO 1  
 Date\_ 20141122  
 Time 11.56  
 INSTRUM spect  
 PROBHD 5 mm PABBO BB-  
 PULPROG zg30  
 TD 65536  
 SOLVENT CDCl3  
 NS 12  
 DS 0  
 SWH 8012.820 Hz  
 FIDRES 0.122266 Hz  
 AQ 4.0894966 sec  
 RG 28.5  
 DW 62.400 usec  
 DE 6.50 usec  
 TE 293.4 K  
 D1 4.0000000 sec  
 TDO 1

===== CHANNEL f1 =====  
 NUC1 1H  
 P1 14.00 usec  
 PL1 -2.00 dB  
 PL1W 11.86359406 W  
 SFO1 400.2236020 MHz  
 SI 32768  
 SF 400.2200000 MHz  
 WDW EM  
 SSB 0  
 LB 0.30 Hz  
 GB 0  
 PC 1.00

<sup>1</sup>H NMR of 11



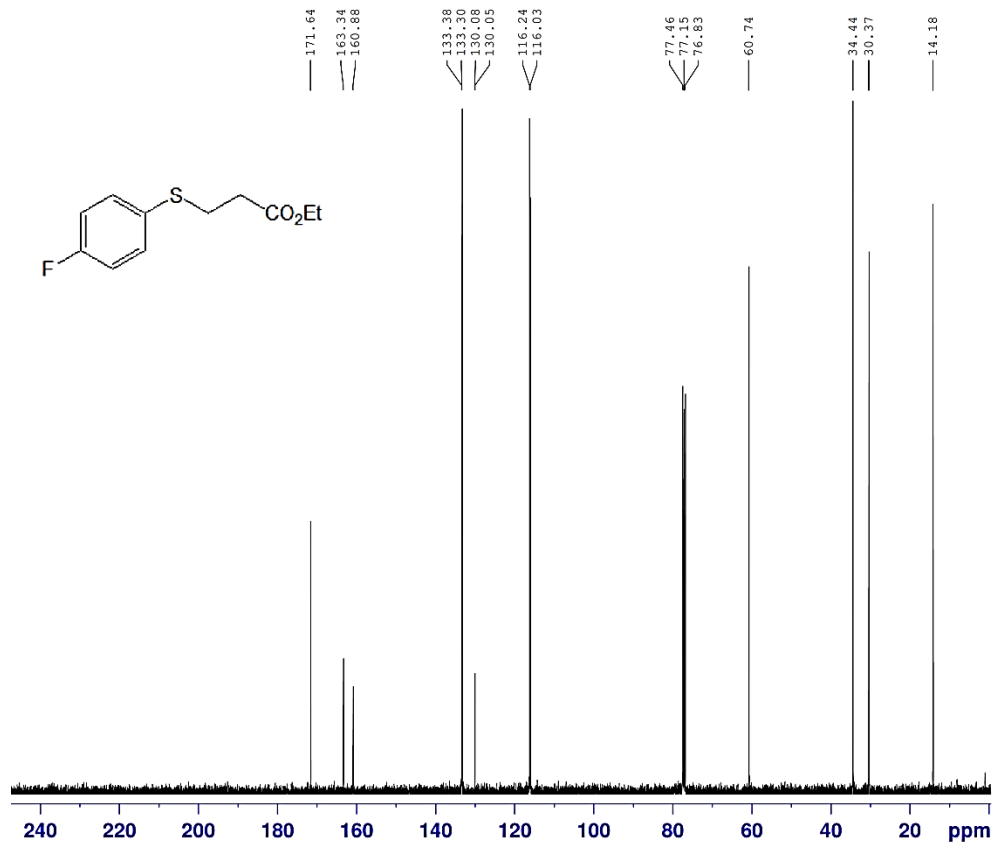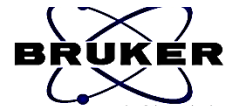

NAME Dr.Gholi nejad  
 EXPNO 509  
 PROCNO 1  
 Date\_ 20141122  
 Time 11.58  
 INSTRUM spect  
 PROBHD 5 mm PABBO BB-  
 PULPROG zgpg30  
 TD 65536  
 SOLVENT CDCl3  
 NS 40  
 DS 0  
 SWH 25252.525 Hz  
 FIDRES 0.385323 Hz  
 AQ 1.2976629 sec  
 RG 2050  
 DW 19.800 usec  
 DE 6.50 usec  
 TE 293.4 K  
 D1 2.0000000 sec  
 D11 0.0300000 sec  
 TDO 1

==== CHANNEL f1 =====  
 NUC1 13C  
 P1 9.00 usec  
 PL1 -0.90 dB  
 PL1W 42.02801895 W  
 SFO1 100.6479784 MHz

==== CHANNEL f2 =====  
 CPDPRG2 waltz16  
 NUC2 1H  
 FCFD2 90.00 usec  
 PL2 -2.00 dB  
 PL12 14.16 dB  
 PL13 17.90 dB  
 PL2W 11.86359406 W  
 PL12W 0.28722104 W  
 PL13W 0.12139934 W  
 SFO2 400.2216009 MHz  
 SI 32768  
 SF 100.6353990 MHz  
 WDW EM  
 SSB 0  
 LB 1.00 Hz  
 GB 0  
 PC 1.40

<sup>13</sup>C NMR of **11**

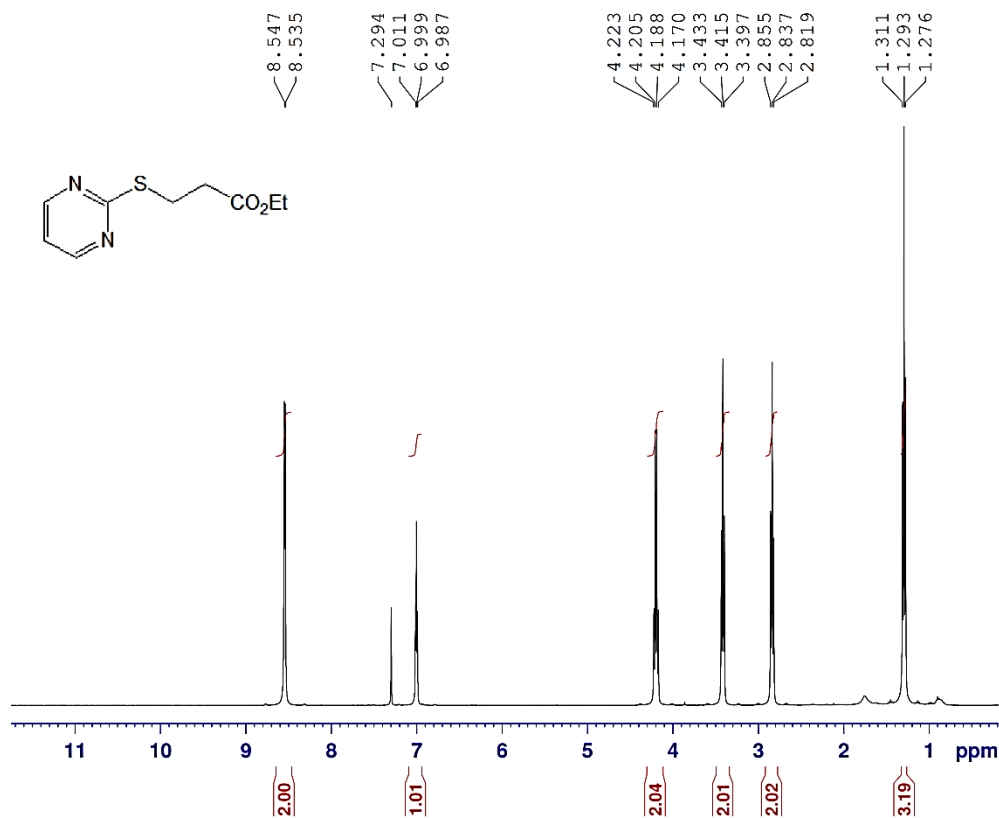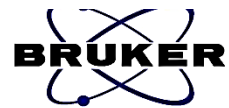

NAME Dr.Gholi nejad  
 EXPNO 504  
 PROCNO 1  
 Date\_ 20141117  
 Time 10.47  
 INSTRUM spect  
 PROBHD 5 mm PABBO BB-  
 PULPROG zg30  
 TD 65536  
 SOLVENT CDCl3  
 NS 17  
 DS 0  
 SWH 8012.820 Hz  
 FIDRES 0.122266 Hz  
 AQ 4.0894966 sec  
 RG 181  
 DW 62.400 usec  
 DE 6.50 usec  
 TE 293.0 K  
 D1 6.0000000 sec  
 TD0 1

===== CHANNEL f1 =====  
 NUC1 1H  
 P1 14.00 usec  
 PL1 -2.00 dB  
 PL1W 11.86359406 W  
 SF01 400.2236020 MHz  
 SI 32768  
 SF 400.2200000 MHz  
 WDW EM  
 SSB 0  
 LB 0.30 Hz  
 GB 0  
 PC 1.00

<sup>1</sup>H NMR of 1m

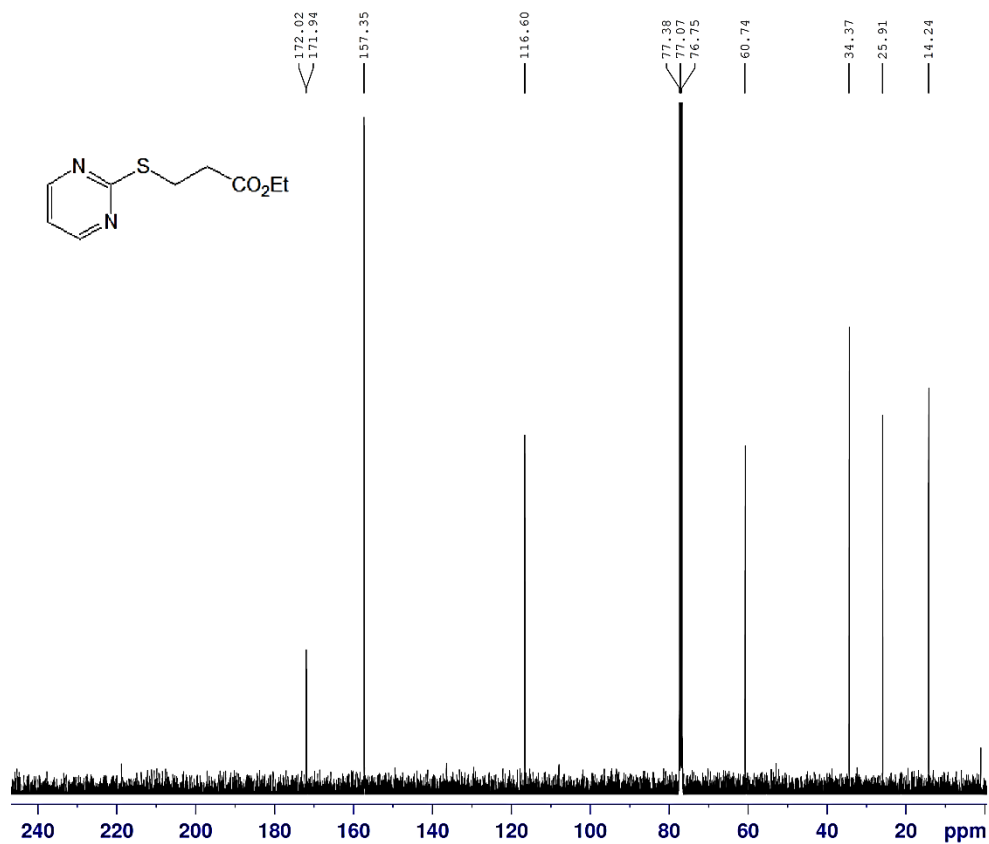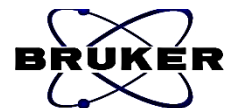

```

NAME      Dr.Gholi nejad
EXPNO     505
PROCNO    1
Date_     20141117
Time      10.50
INSTRUM   spect
PROBHD    5 mm PABBO BB-
PULPROG   zgpg30
TD        65536
SOLVENT   CDCl3
NS        140
DS        0
SWH       25252.525 Hz
FIDRES    0.385323 Hz
AQ        1.2976629 sec
RG        2050
DW        19.800 usec
DE        6.50 usec
TE        293.2 K
D1        2.00000000 sec
D11       0.03000000 sec
TD0       1
  
```

```

===== CHANNEL f1 =====
NUC1      13C
P1        9.00 usec
PL1       -0.90 dB
PL1W      42.02801895 W
SFO1      100.6479784 MHz
  
```

```

===== CHANNEL f2 =====
CPDPRG2   waltz16
NUC2      1H
PCPD2     90.00 usec
PL2       -2.00 dB
PL12      14.16 dB
PL13      17.90 dB
PL2W      11.86359406 W
PL12W     0.28722104 W
PL13W     0.12139934 W
SFO2      400.2216009 MHz
SI        32768
SF        100.6353990 MHz
WDW       EM
SSB       0
LB        1.00 Hz
GB        0
PC        1.40
  
```

<sup>13</sup>C NMR of 1m

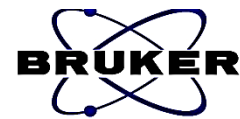

NAME Dr.Gholi nejad  
EXPNO 576  
PROCNO 1  
Date\_ 20150121  
Time 14.28  
INSTRUM spect  
PROBHD 5 mm PABBO BB-  
PULPROG zg30  
TD 65536  
SOLVENT CDCl3  
NS 14  
DS 0  
SWH 8012.820 Hz  
FIDRES 0.122266 Hz  
AQ 4.0894566 se  
RG 203  
DW 62.400 us  
DE 6.50 us  
TE 293.6 K  
D1 4.0000000 se  
TD0 1

===== CHANNEL f1 =====  
NUC1 1H  
P1 14.00 us  
PL1 -2.00 dB  
PL1W 11.86359406 W  
SF01 400.2236020 MHz  
SI 32768  
SF 400.2200000 MHz  
WDW EM  
SSB 0  
LB 0.30 Hz  
GB 0  
PC 1.00

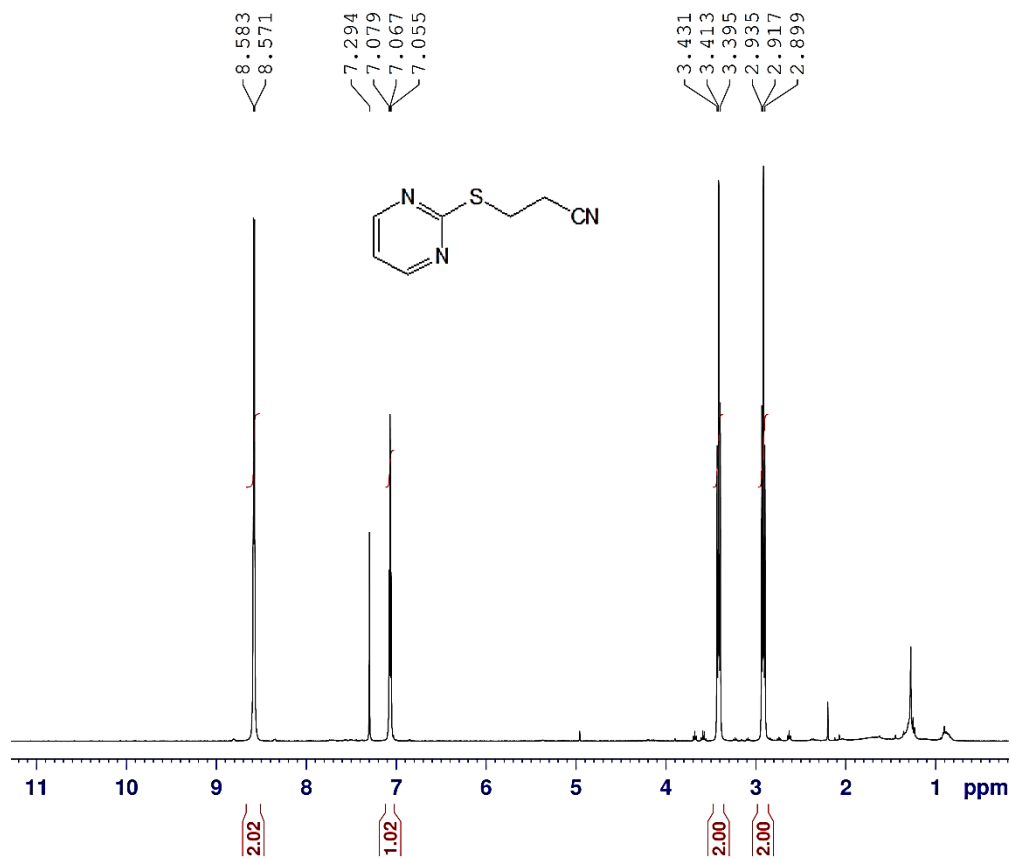

<sup>1</sup>H NMR of 1n

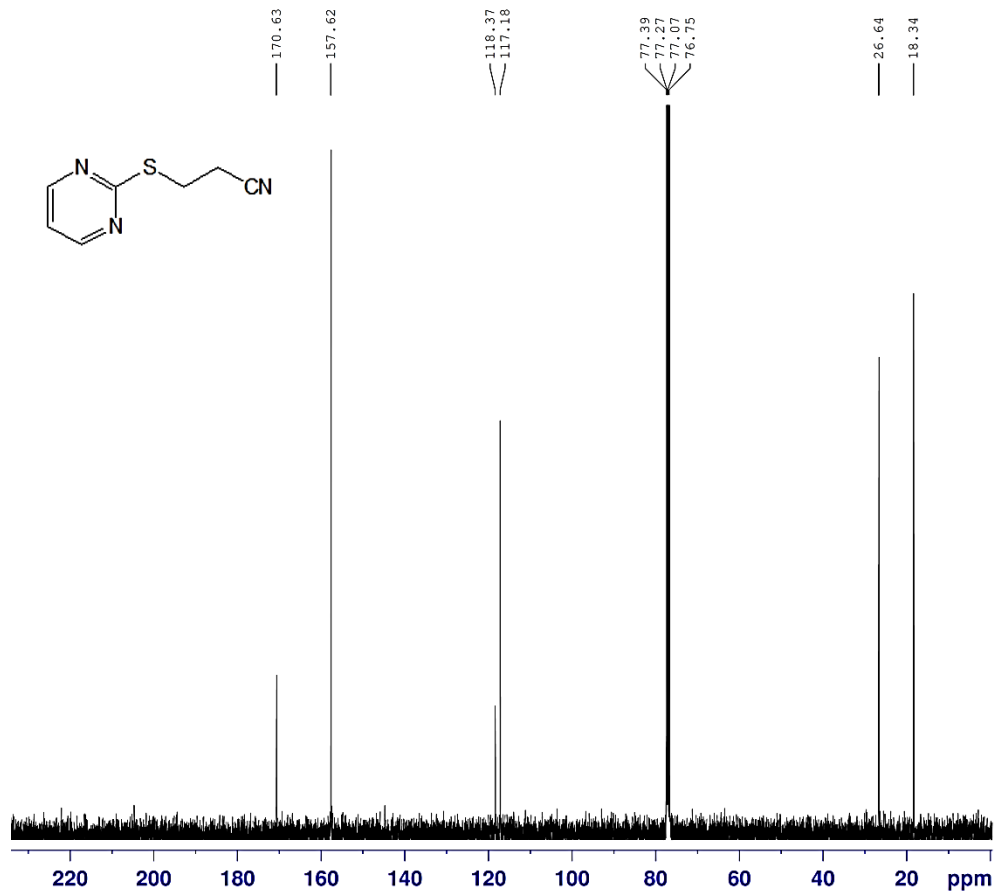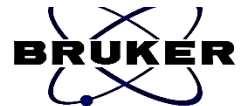

```

NAME      Dr.Gholi nejad
EXPNO     577
PROCNO    1
Date_     20150121
Time      14.33
INSTRUM   spect
PROBHD    5 mm PABBO BB-
PULPROG   zgpg30
TD         65536
SOLVENT   CDC13
NS         220
DS         0
SWH        25252.525 Hz
FIDRES     0.385323 Hz
AQ         1.2976629 se
RG         2050
DW         19.800 us
DE         6.50 us
TE         293.9 K
D1         2.0000000 se
D11        0.0300000 se
TD0        1
  
```

```

===== CHANNEL f1 =====
NUC1      13C
P1        9.00 us
PL1       -0.90 dB
PL1W      42.02801895 W
SFO1      100.6479784 MH
  
```

```

===== CHANNEL f2 =====
CPDPRG2   waltz16
NUC2      1H
PCPD2     90.00 us
PL2       -2.00 dB
PL12      14.16 dB
PL13      17.90 dB
PL2W      11.86359406 W
PL12W     0.28722104 W
PL13W     0.12139934 W
SFO2      400.2216009 MH
SI         32768
SF         100.6353990 MH
WDW        EM
SSB        0
LB         1.00 Hz
GB         0
PC         1.40
  
```

<sup>13</sup>C NMR of **1n**

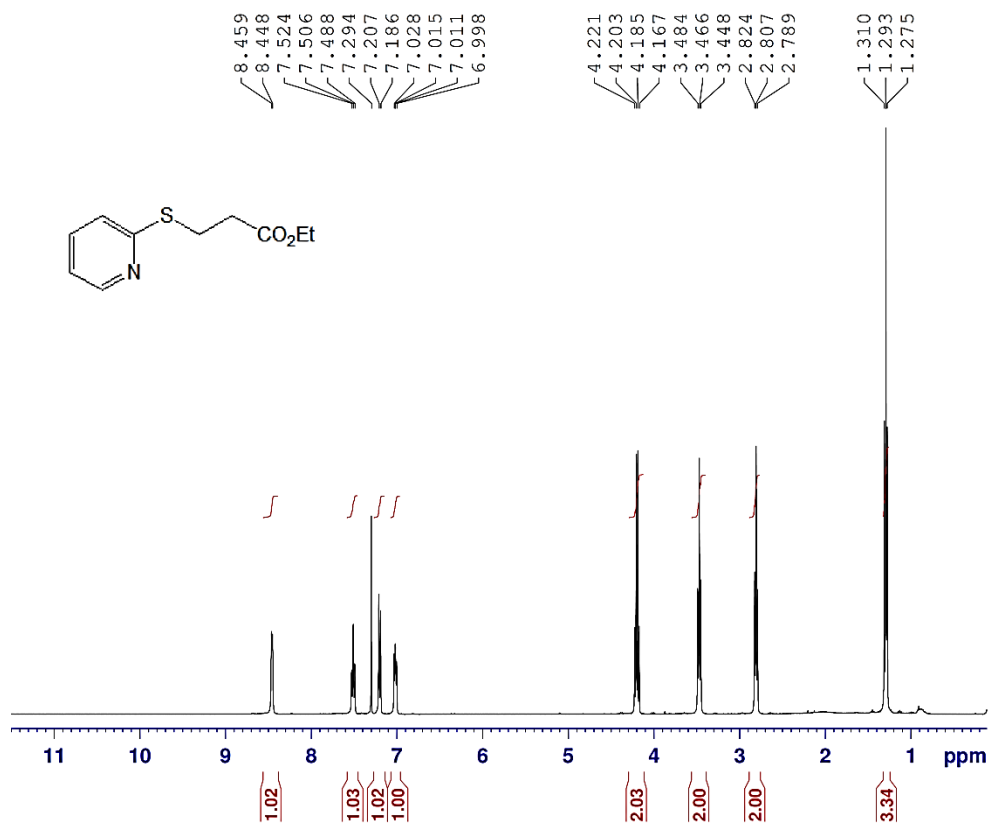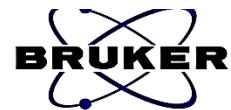

```

NAME      Dr.Gholi nejad
EXPNO     516
PROCNO    1
Date_     20141126
Time      14.28
INSTRUM   spect
PROBHD    5 mm PABBO BB-
PULPROG   zg30
TD        65536
SOLVENT   CDCl3
NS        12
DS        0
SWH       8012.820 Hz
FIDRES    0.122266 Hz
AQ        4.0894966 sec
RG        228
DW        62.400 usec
DE        6.50 usec
TE        293.7 K
D1        4.00000000 sec
TD0       1

===== CHANNEL f1 =====
NUC1      1H
P1        14.00 usec
PL1       -2.00 dB
PL1W      11.86359406 W
SF01      400.2236020 MHz
SI        32768
SF        400.2200000 MHz
WDW       EM
SSB       0
LB        0.30 Hz
GB        0
PC        1.00

```

<sup>1</sup>H NMR of **1o**

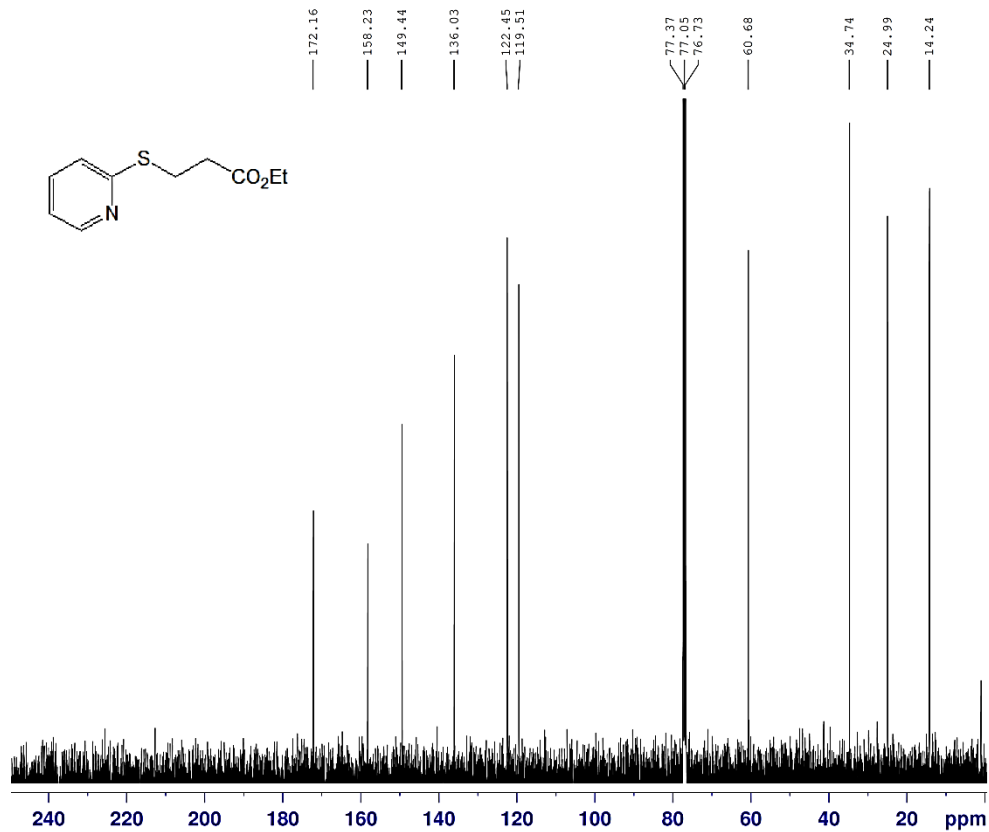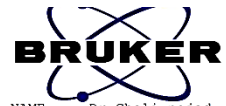

```

NAME      Dr.Gholi nejad
EXPNO     517
PROCNO    1
Date_     20141126
Time      14.34
INSTRUM   spect
PROBHD    5 mm PABBO BB-
PULPROG   zgpg30
TD         65536
SOLVENT   CDC13
NS         200
DS         0
SWH        25252.525 Hz
FIDRES     0.385323 Hz
AQ         1.2976629 sec
RG         2050
DW         19.800 usec
DE         6.50 usec
TE         294.1 K
D1         2.00000000 sec
D11        0.03000000 sec
TD0        1
  
```

```

===== CHANNEL f1 =====
NUC1      13C
P1         9.00 usec
PL1        -0.90 dB
PL1W      42.02801895 W
SFO1      100.6479784 MHz
  
```

```

===== CHANNEL f2 =====
CPDPRG2   waltz16
NUC2       1H
PCPD2     90.00 usec
PL2        -2.00 dB
PL12       14.16 dB
PL13       17.90 dB
PL2W      11.86359406 W
PL12W     0.28722104 W
PL13W     0.12139934 W
SFO2      400.2216009 MHz
SI         32768
SF         100.6353990 MHz
WDW        EM
SSB         0
LB         1.00 Hz
GB         0
PC         1.40
  
```

<sup>13</sup>C NMR of **1o**

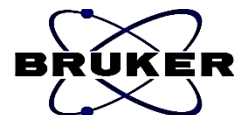

NAME Dr.Gholi nejad  
EXPNO 522  
PROCNO 1  
Date\_ 20141203  
Time 10.31  
INSTRUM spect  
PROBHD 5 mm PABBO BB-  
PULPROG zg30  
TD 65536  
SOLVENT CDCl3  
NS 14  
DS 0  
SWH 8012.820 Hz  
FIDRES 0.122266 Hz  
AQ 4.0894966 sec  
RG 256  
DW 62.400 usec  
DE 6.50 usec  
TE 293.4 K  
D1 4.0000000 sec  
TD0 1

==== CHANNEL f1 =====  
NUC1 1H  
P1 14.00 usec  
PL1 -2.00 dB  
PL1W 11.86359406 W  
SF01 400.2236020 MHz  
SI 32768  
SF 400.2200000 MHz  
WDW EM  
SSB 0  
LB 0.30 Hz  
GB 0  
PC 1.00

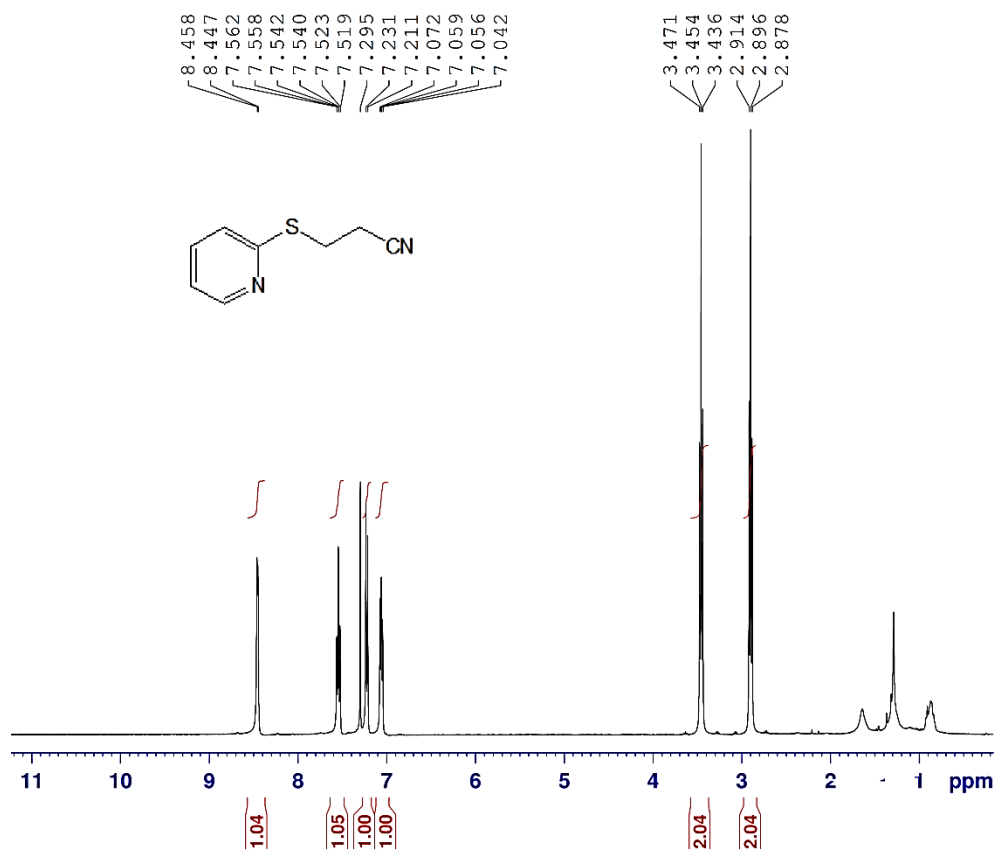

$^1\text{H}$  NMR of **1p**



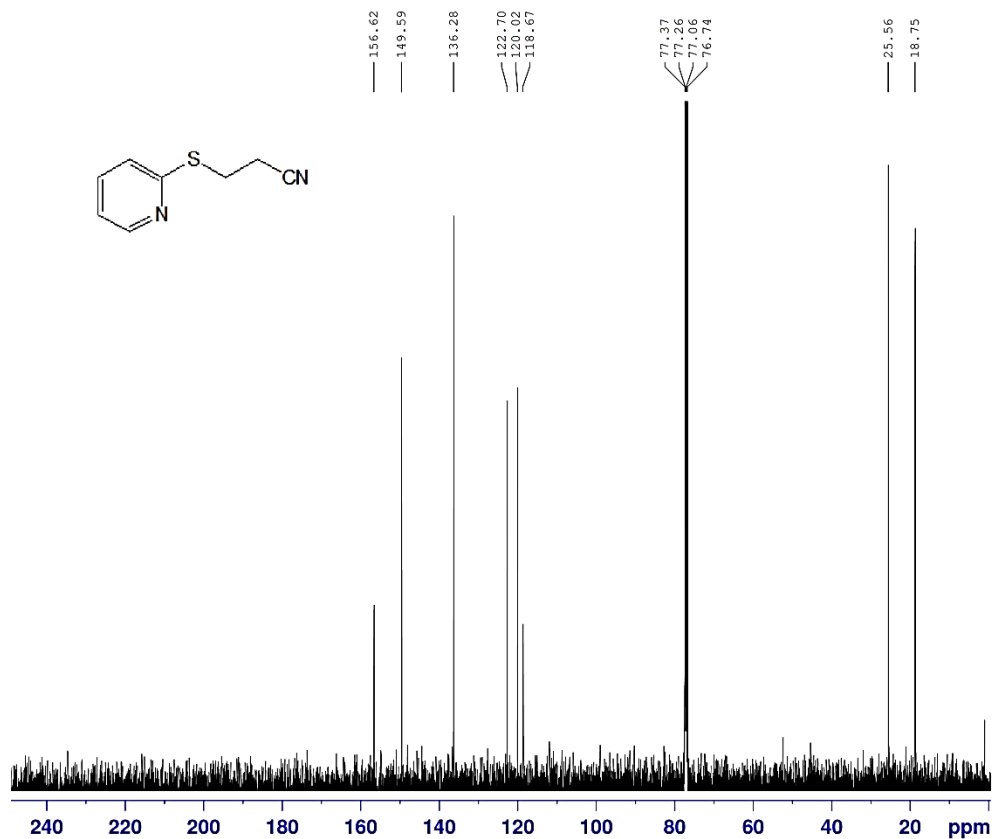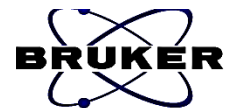

```

NAME      Dr.Gholi nejad
EXPNO     523
PROCNO    1
Date_     20141203
Time      10.34
INSTRUM   spect
PROBHD    5 mm PABBO BB-
PULPROG   zgpg30
TD         65536
SOLVENT   CDCl3
NS         240
DS         0
SWH       25252.525 Hz
FIDRES    0.385323 Hz
AQ         1.2976629 sec
RG         2050
DW         19.800 usec
DE         6.50 usec
TE         293.6 K
D1         2.0000000 sec
D11        0.0300000 sec
TD0        1
  
```

```

===== CHANNEL f1 =====
NUC1      13C
P1         9.00 usec
PL1       -0.90 dB
PL1W      42.02801895 W
SFO1      100.6479784 MHz
  
```

```

===== CHANNEL f2 =====
CPDPRG2   waltz16
NUC2       1H
PCPD2     90.00 usec
PL2       -2.00 dB
PL12      14.16 dB
PL13      17.90 dB
PL2W      11.86359406 W
PL12W     0.28722104 W
PL13W     0.12139934 W
SFO2      400.2216009 MHz
SI         32768
SF        100.6353990 MHz
WDW        EM
SSB         0
LB         1.00 Hz
GB          0
PC          1.40
  
```

<sup>13</sup>C NMR of 1p

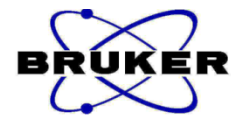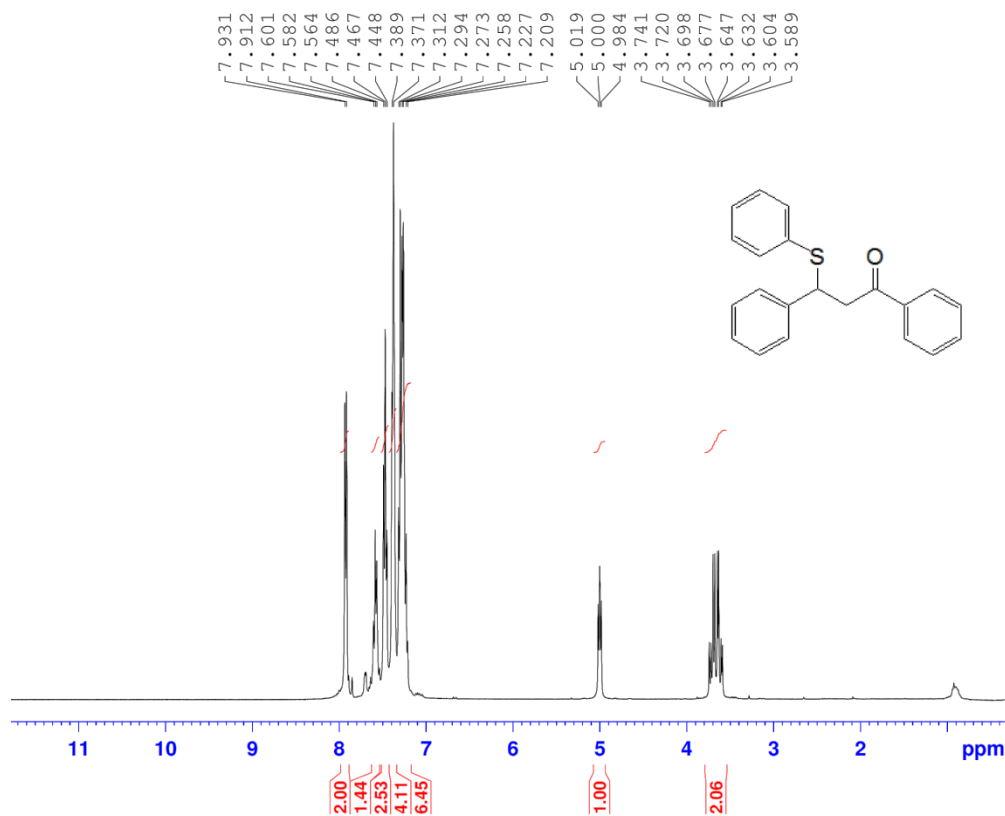

<sup>1</sup>H NMR of 1q

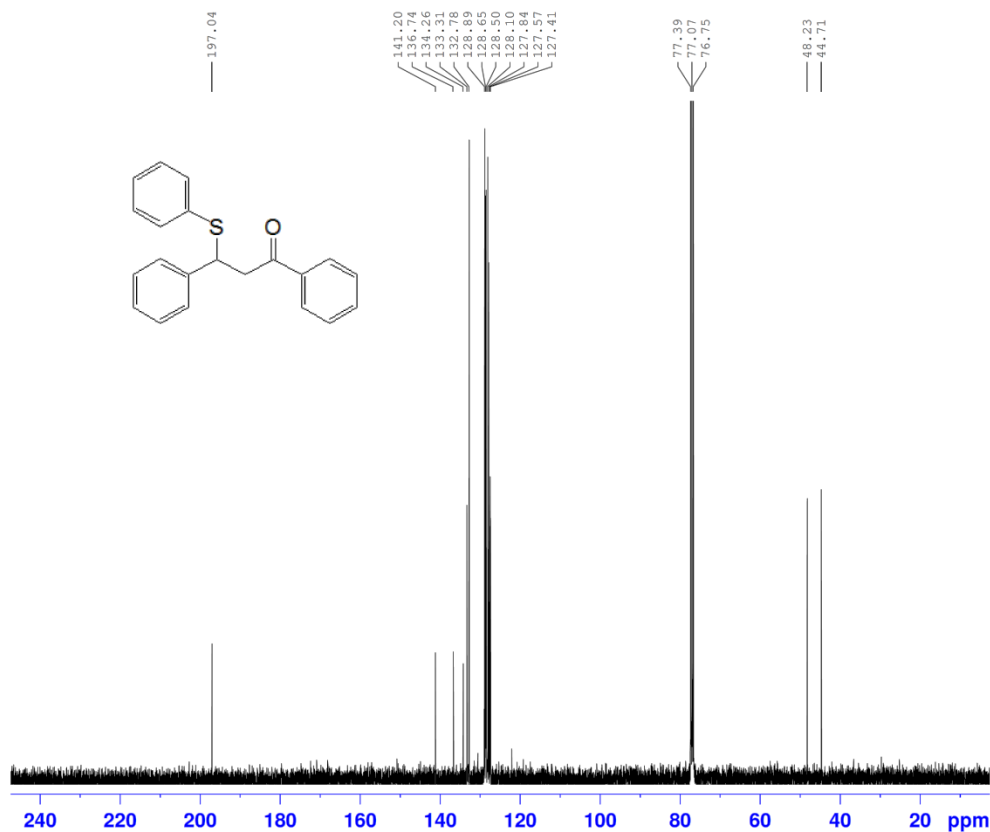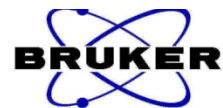

```

NAME      Dr.Gholi nejad
EXPNO     601
PROCNO    1
Date_     20150509
Time      9.49
INSTRUM   spect
PROBHD    5 mm PABBO BB-
PULPROG   zgpg30
TD         65536
SOLVENT   CDCl3
NS         200
DS         0
SWH        25252.525 Hz
FIDRES     0.385323 Hz
AQ         1.2976629 sec
RG         2050
DW         19.800 usec
DE         6.50 usec
TE         294.5 K
D1         2.0000000 sec
D11        0.0300000 sec
TD0        1

```

```

===== CHANNEL f1 =====
NUC1       13C
P1         9.00 usec
PL1        -0.90 dB
PL1W       42.02801895 W
SFO1       100.6479784 MHz

```

```

===== CHANNEL f2 =====
CPDPRG2    waltz16
NUC2        1H
PCPD2       90.00 usec
PL2         -2.00 dB
PL12        14.16 dB
PL13        17.90 dB
PL2W        11.86359406 W
PL12W       0.28722104 W
PL13W       0.12139934 W
SFO2        400.2216009 MHz
SI          32768
SF          100.6353990 MHz
WDW         EM
SSB         0
LB          1.00 Hz
GB          0
PC          1.40

```

<sup>13</sup>C NMR of 1q

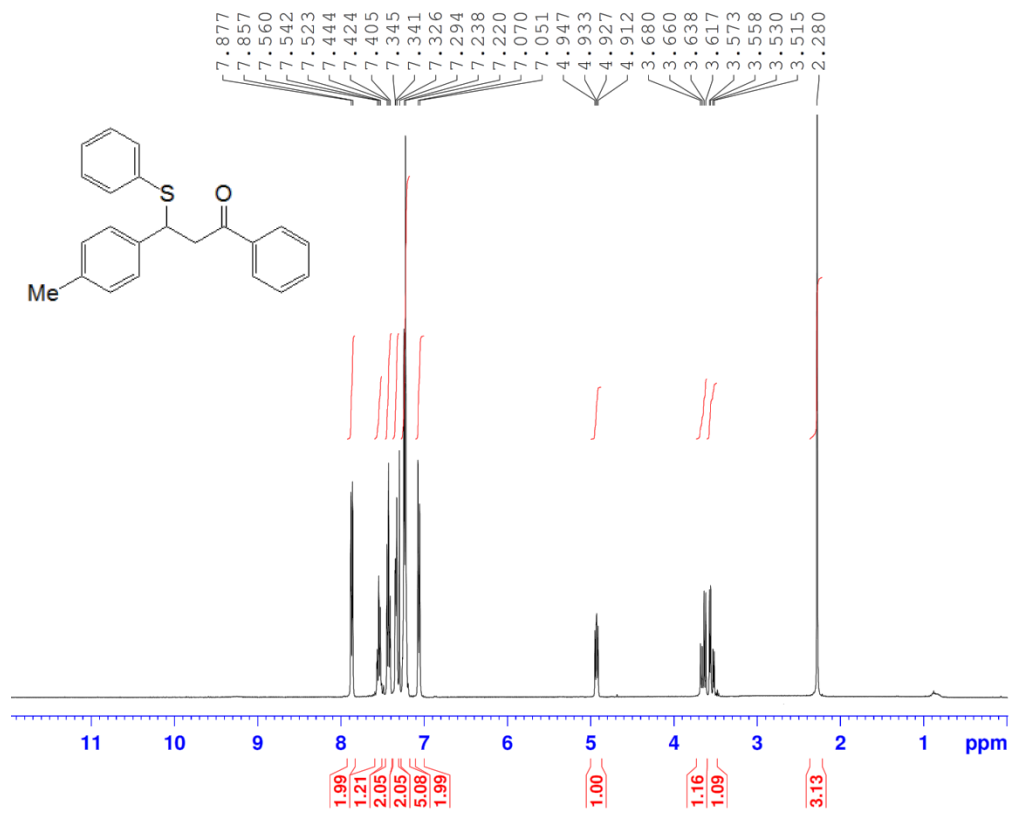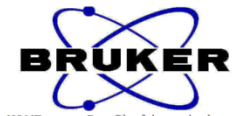

Dr.Gholi nejad  
 NAME  
 EXPNO 597  
 PROCNO 1  
 Date\_ 20150507  
 Time 12.36  
 INSTRUM spect  
 PROBHD 5 mm PABBO BB-  
 PULPROG zg30  
 TD 65536  
 SOLVENT CDCl3  
 NS 14  
 DS 0  
 SWH 8012.820 Hz  
 FIDRES 0.122266 Hz  
 AQ 4.0894966 sec  
 RG 90.5  
 DW 62.400 usec  
 DE 6.50 usec  
 TE 293.0 K  
 D1 4.00000000 sec  
 TD0 1

===== CHANNEL f1 =====  
 NUC1 1H  
 P1 14.00 usec  
 PL1 -2.00 dB  
 PL1W 11.86359406 W  
 SF01 400.2236020 MHz  
 SI 32768  
 SF 400.2200000 MHz  
 WDW EM  
 SSB 0  
 LB 0.30 Hz  
 GB 0  
 PC 1.00

<sup>1</sup>H NMR of 1r

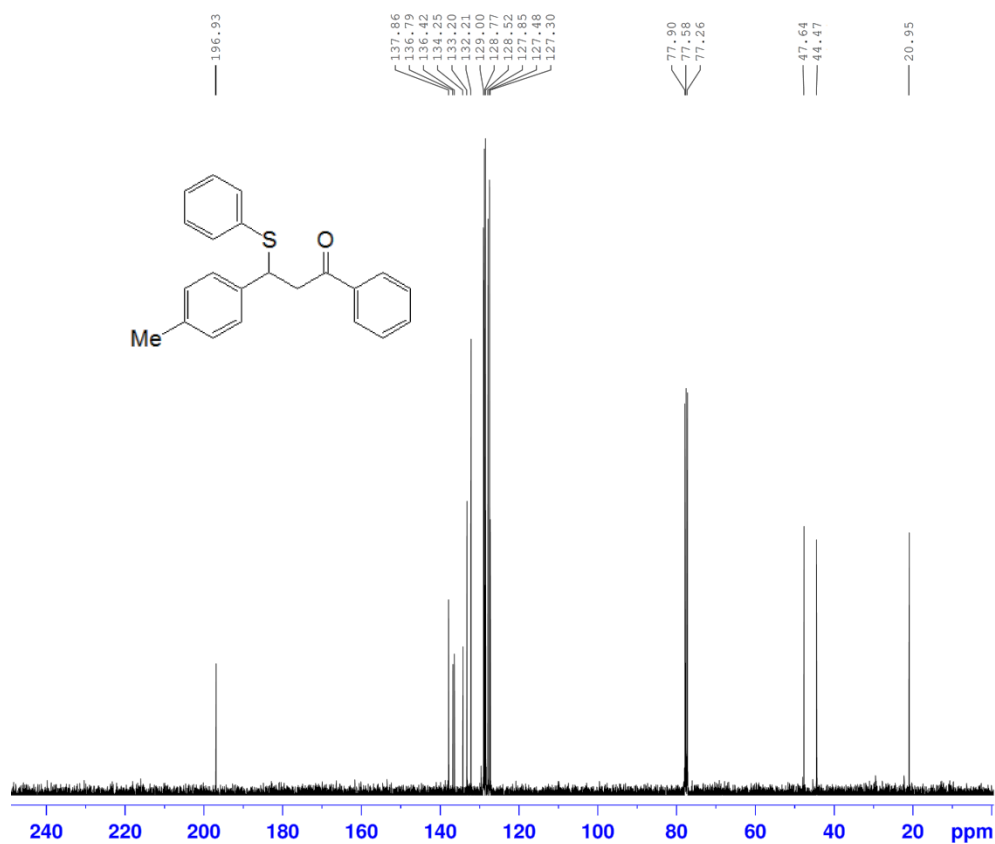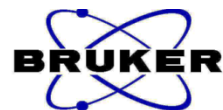

```

NAME      Dr.Gholi nejad
EXPNO     598
PROCNO    1
Date_     20150507
Time      12.47
INSTRUM   spect
PROBHD    5 mm PABBO BB-
PULPROG   zgpg30
TD         65536
SOLVENT   CDCl3
NS         50
DS         0
SWH        25252.525 Hz
FIDRES    0.385323 Hz
AQ         1.2976629 sec
RG         2050
DW         19.800 usec
DE         6.50 usec
TE         292.9 K
D1         2.0000000 sec
D11        0.0300000 sec
TDO        1
  
```

```

===== CHANNEL f1 =====
NUC1      13C
P1         9.00 usec
PL1       -0.90 dB
PL1W      42.02801895 W
SFO1      100.6479784 MHz
  
```

```

===== CHANNEL f2 =====
CPDPRG2   waltz16
NUC2       1H
PCPD2     90.00 usec
PL2        -2.00 dB
PL12       14.16 dB
PL13       17.90 dB
PL2W      11.86359406 W
PL12W     0.28722104 W
PL13W     0.12139934 W
SFO2      400.2216009 MHz
SI         32768
SF        100.6353990 MHz
WDW        EM
SSB         0
LB         1.00 Hz
GB         0
PC         1.40
  
```

<sup>13</sup>C NMR of 1r

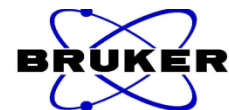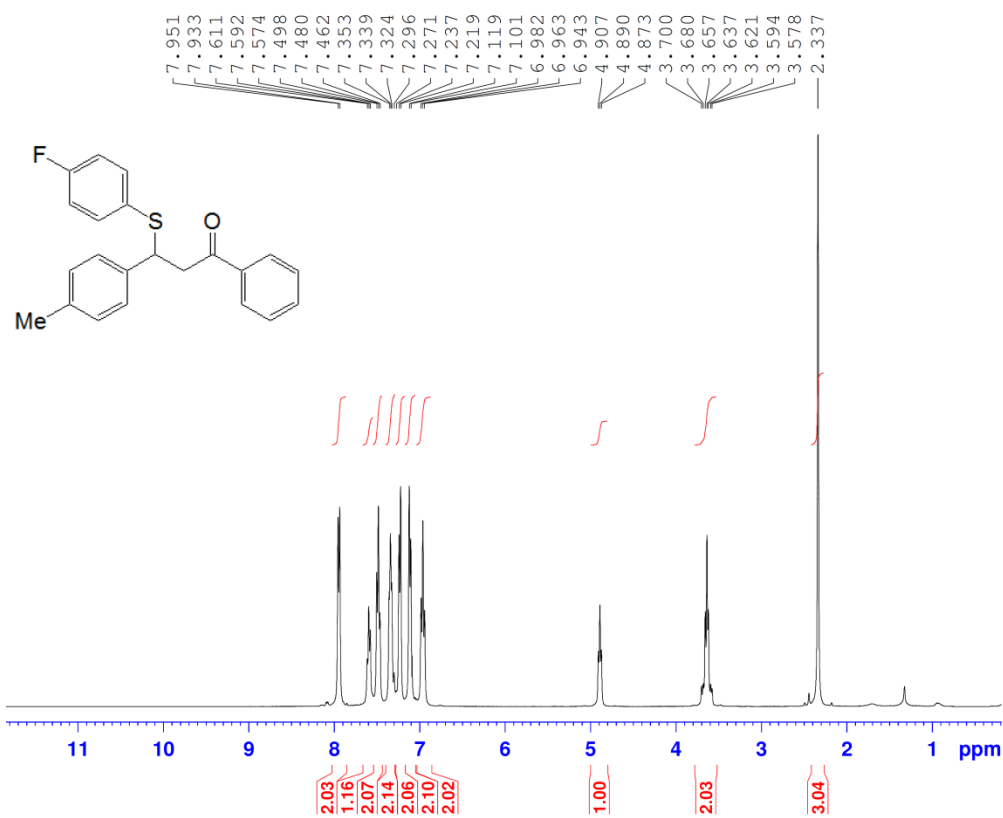

```
NAME      Dr.Gholi nejad
EXPNO     602
PROCNO    1
Date_     20150509
Time      10.37
INSTRUM   spect
PROBHD    5 mm PABBO BB-
PULPROG   zg30
TD         65536
SOLVENT   CDCl3
NS         14
DS         0
SWH        8012.820 Hz
FIDRES     0.122266 Hz
AQ         4.0894966 sec
RG         40.3
DW         62.400 usec
DE         6.50 usec
TE         294.4 K
D1         4.00000000 sec
TD0        1
===== CHANNEL f1 =====
NUC1      1H
P1        14.00 usec
PL1       -2.00 dB
PL1W      11.86359406 W
SFO1      400.2236020 MHz
SI         32768
SF         400.2200000 MHz
WDB        EM
SSB        0
LB         0.30 Hz
GB         0
PC         1.00
```

$^1\text{H}$  NMR of 1s

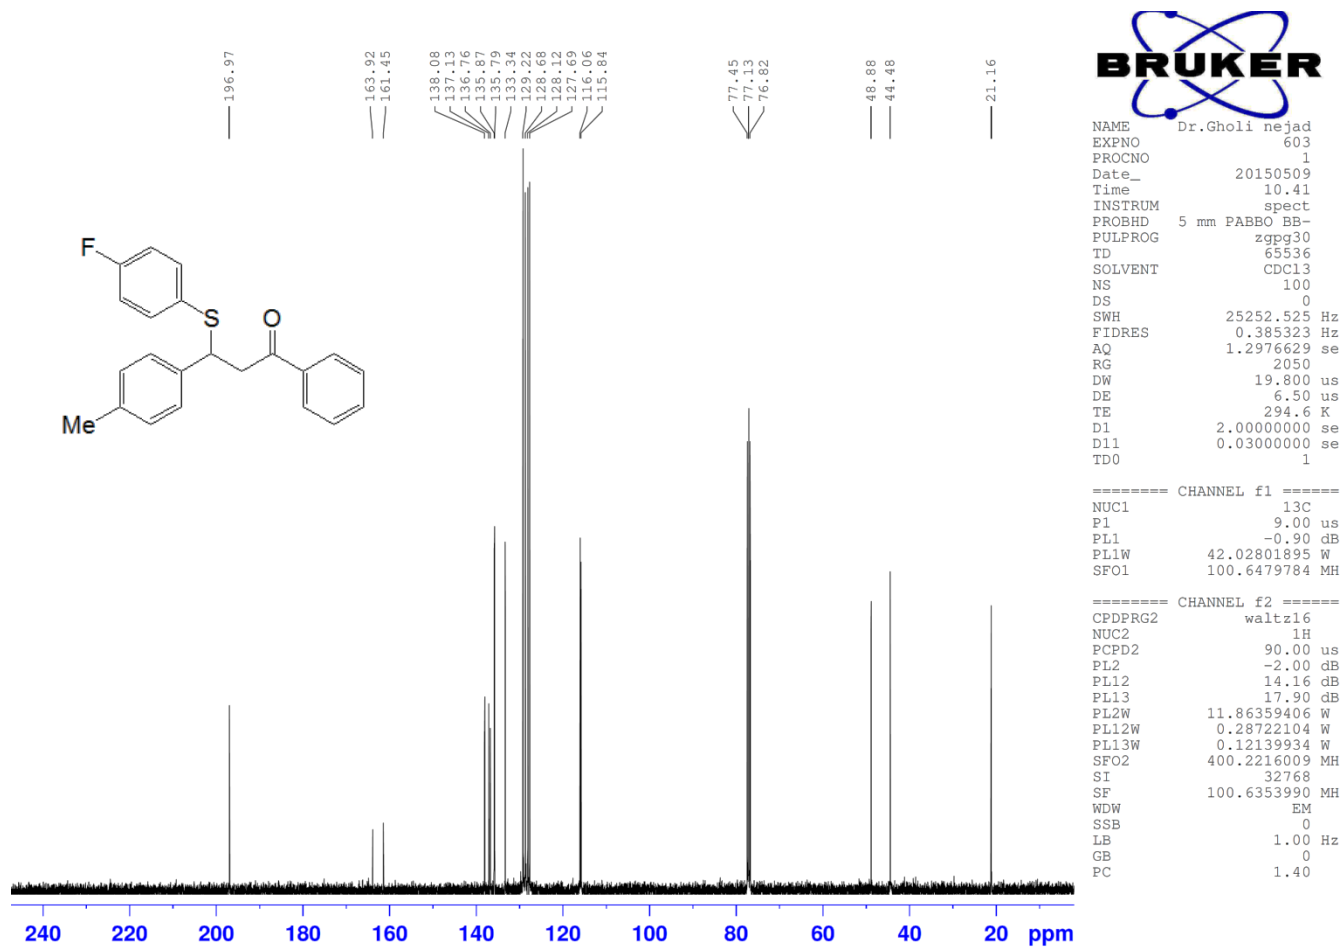

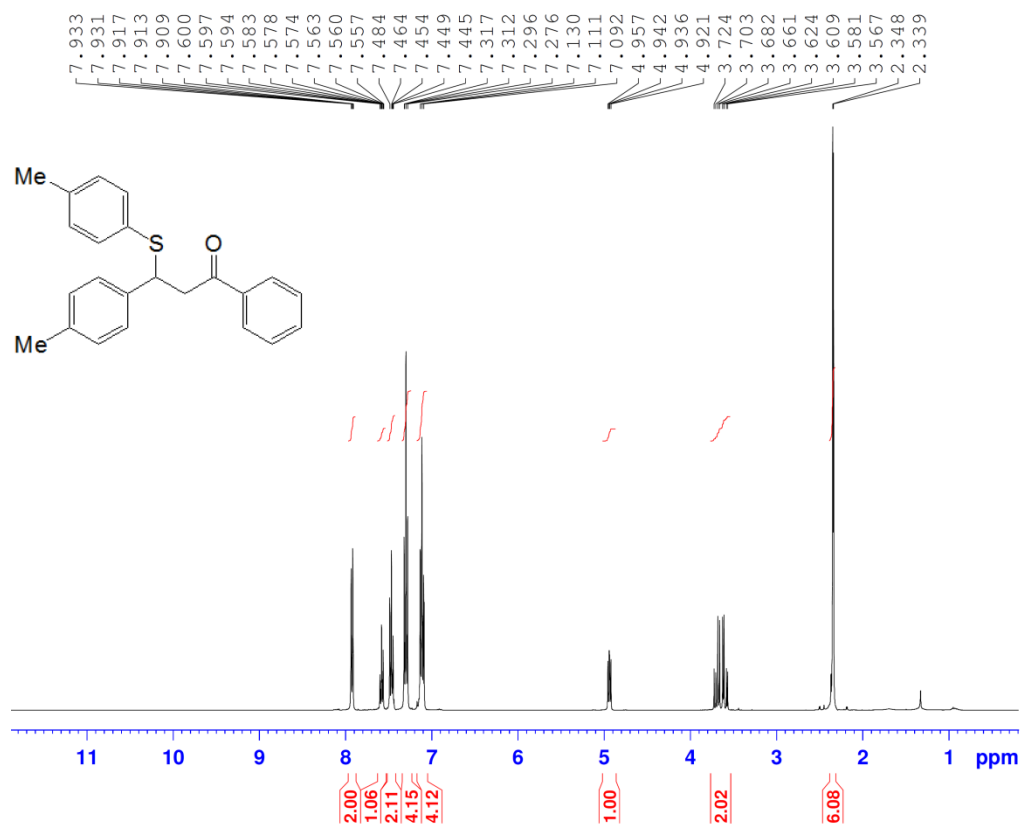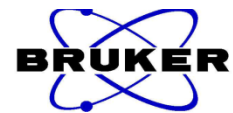

NAME Dr.Gholi nejad  
 EXPNO 604  
 PROCNO 1  
 Date\_ 20150509  
 Time 10.53  
 INSTRUM spect  
 PROBHD 5 mm PABBO BB-  
 PULPROG zg30  
 TD 65536  
 SOLVENT CDCl3  
 NS 14  
 DS 0  
 SWH 8012.820 Hz  
 FIDRES 0.122266 Hz  
 AQ 4.0894966 se  
 RG 40.3  
 DW 62.400 us  
 DE 6.50 us  
 TE 294.5 K  
 D1 4.00000000 se  
 TD0 1

===== CHANNEL f1 =====  
 NUC1 1H  
 P1 14.00 us  
 PL1 -2.00 dB  
 PLLW 11.86359406 W  
 SFO1 400.2236020 MH  
 SI 32768  
 SF 400.2200000 MH  
 WDW EM  
 SSB 0  
 LB 0.30 Hz  
 GB 0  
 PC 1.00

<sup>1</sup>H NMR of 1t



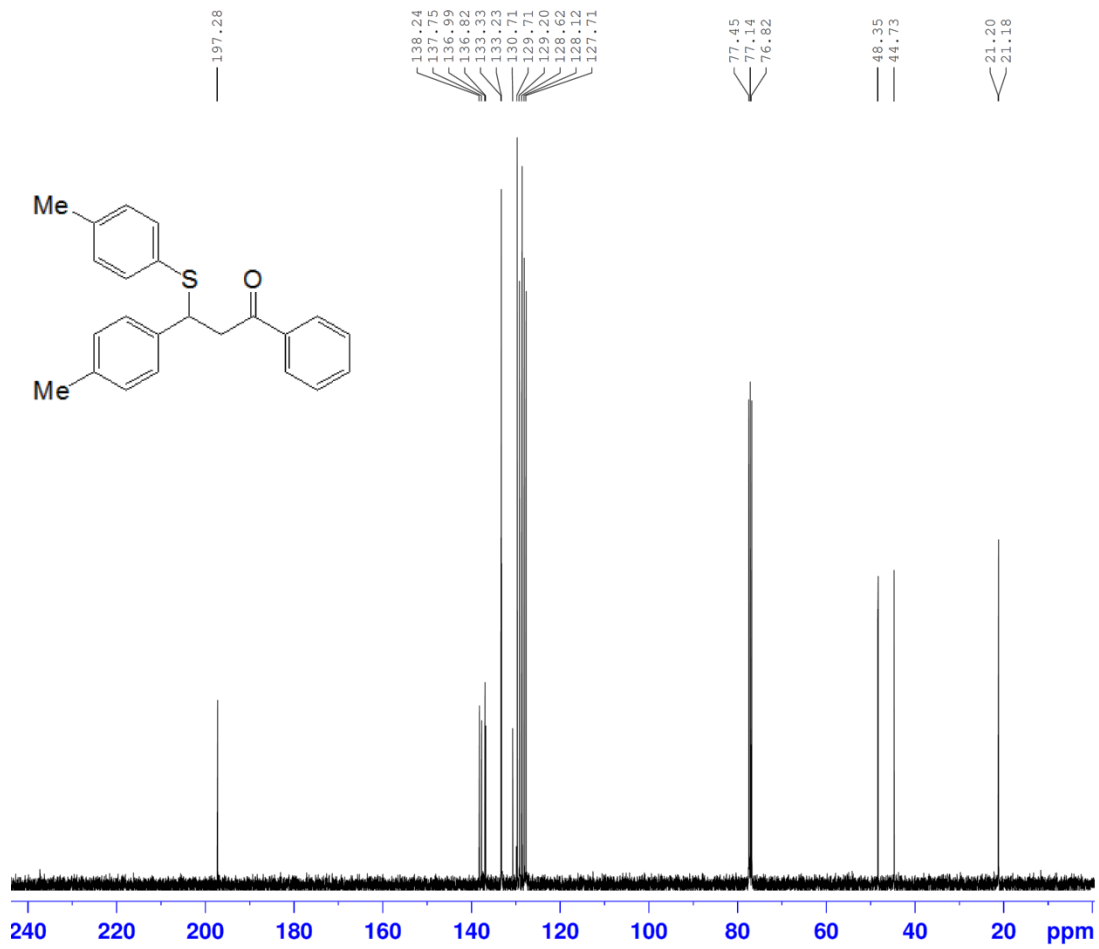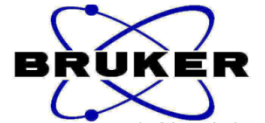

```

NAME      Dr.Gholi nejad
EXPNO     605
PROCNO    1
Date_     20150509
Time      10.55
INSTRUM   spect
PROBHD    5 mm PABBO BB-
PULPROG   zgpg30
TD         65536
SOLVENT   CDCl3
NS         60
DS         0
SWH        25252.525 Hz
FIDRES     0.385323 Hz
AQ         1.2976629 sec
RG         2050
DW         19.800 usec
DE         6.50 usec
TE         294.4 K
D1         2.00000000 sec
D11        0.03000000 sec
TD0        1
  
```

```

===== CHANNEL f1 =====
NUC1      13C
P1         9.00 usec
PL1        -0.90 dB
PL1W      42.02801895 W
SFO1      100.6479784 MHz
  
```

```

===== CHANNEL f2 =====
CPDPRG2   waltz16
NUC2       1H
PCPD2     90.00 usec
PL2        -2.00 dB
PL12       14.16 dB
PL13       17.90 dB
PL2W      11.86359406 W
PL12W     0.28722104 W
PL13W     0.12139934 W
SFO2      400.2216009 MHz
SI         32768
SF        100.6353990 MHz
WDW        EM
SSB         0
LB         1.00 Hz
GB          0
PC         1.40
  
```

<sup>13</sup>C NMR of 1t
